# Supplementary material for: Upstream regulator of genomic imprinting in rice endosperm is a small RNA-associated chromatin remodeler
Source: PubMed Central journal article supplement — Nat Commun. 2024 Sep 6;15:7807. doi: 10.1038/s41467-024-52239-z (PMC11379814; doi:10.1038/s41467-024-52239-z), 2024-09-06
Supplement: 41467_2024_52239_MOESM1_ESM.pdf [file 41467_2024_52239_MOESM1_ESM.pdf]

# Supplementary Material for

## Upstream regulator of genomic imprinting in rice endosperm is a small RNA-associated chromatin remodeler

Avik Kumar Pal<sup>1</sup>, Vivek Hari Sundar G<sup>1</sup>, Amruta. B. Nambiar<sup>1</sup>, and P.V. Shivaprasad<sup>1\*</sup>

<sup>1</sup>National Centre for Biological Sciences, Tata Institute of Fundamental Research, GKVK Campus, Bangalore 560 065, India.

\*Email for correspondence: [shivaprasad@ncbs.res.in](mailto:shivaprasad@ncbs.res.in)

**Supplementary Figures 1 to 16**

**Supplementary Tables 1 to 4**

**Supplementary References**

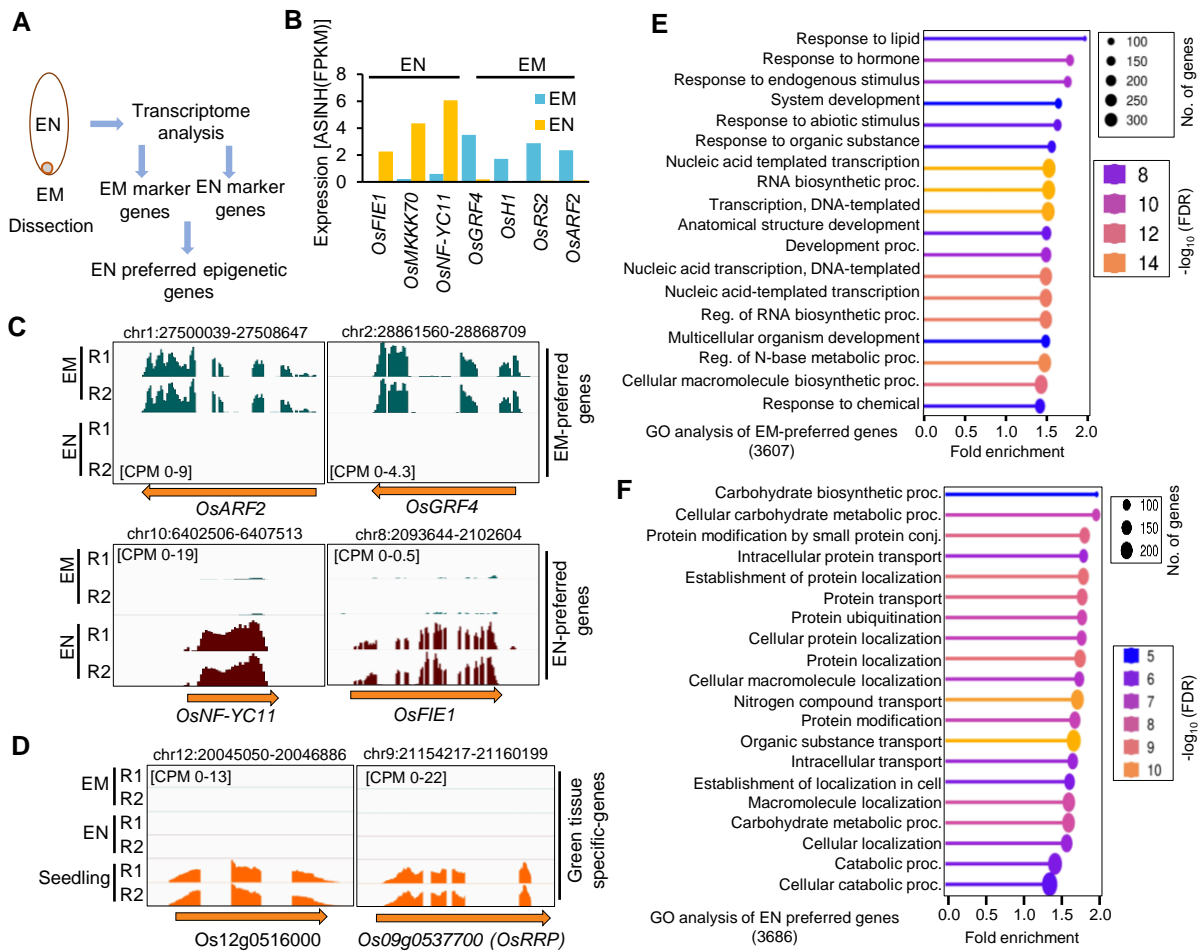

**Supplementary Figure 1. Transcriptome analysis of endosperm and embryo tissues.**

(A) Schematic showing tissue collection for transcriptome analysis. (B) Barplots showing expression of embryo (EM) and endosperm (EN)-specific marker genes in transcriptome analysis. (C) IGV screenshots showing expression of known EM- and EN-specific marker genes in transcriptome. (D) IGV screenshots showing expression of non-seed expressing genes in transcriptome. (E) GO analysis of EM-preferred genes. proc.-process. (F) GO analysis of EN-preferred genes. Source data are provided as a Source Data file.

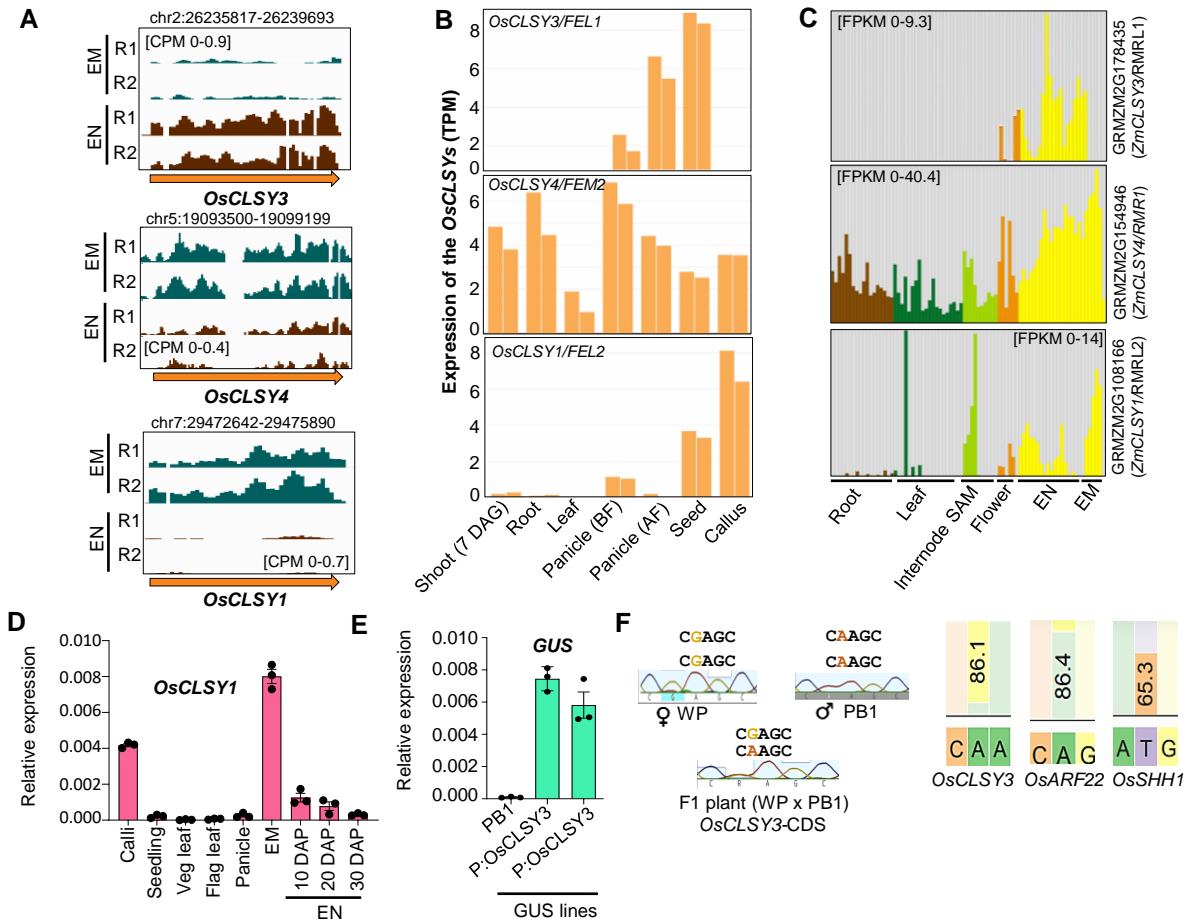

**Supplementary Figure 2. *OsCLS Y3* is an endosperm-preferred gene among monocots.**

(A) IGV screenshots showing expression of *OsCLS Ys* in EN and EM. (B) Barplots representing expression of *OsCLS Ys* across different tissues (The Rice Annotation Project-<https://rapdb.dna.affrc.go.jp/>). (C) Barplots representing expression of maize *CLS Ys* across different tissues (MaizeDB-<https://www.maizegdb.org/>). (D) Barplot showing expression of *OsCLS Y1* across tissues. *OsActin* served as control. Data represent means  $\pm$  standard error (SE).  $n=3$ . Experiment repeated at least twice with independent samples and consistent results were obtained. (E) Barplot showing expression of GUS in the EN of P:*OsCLS Y3*:GUS transgenic lines. *OsGAPDH* served as control. Data represent means  $\pm$  SE of 2 independent biological replicates with 3 technical replicates each. (F) Scheme depicting validation of WP and PB1 cross and the SNPs identified in CDS of *OsCLS Y3*. Stacked barplots showing observed transcript contribution of three genes in WWP EN (mismatches were calculated in crispresso2). Source data are provided as a Source Data file.

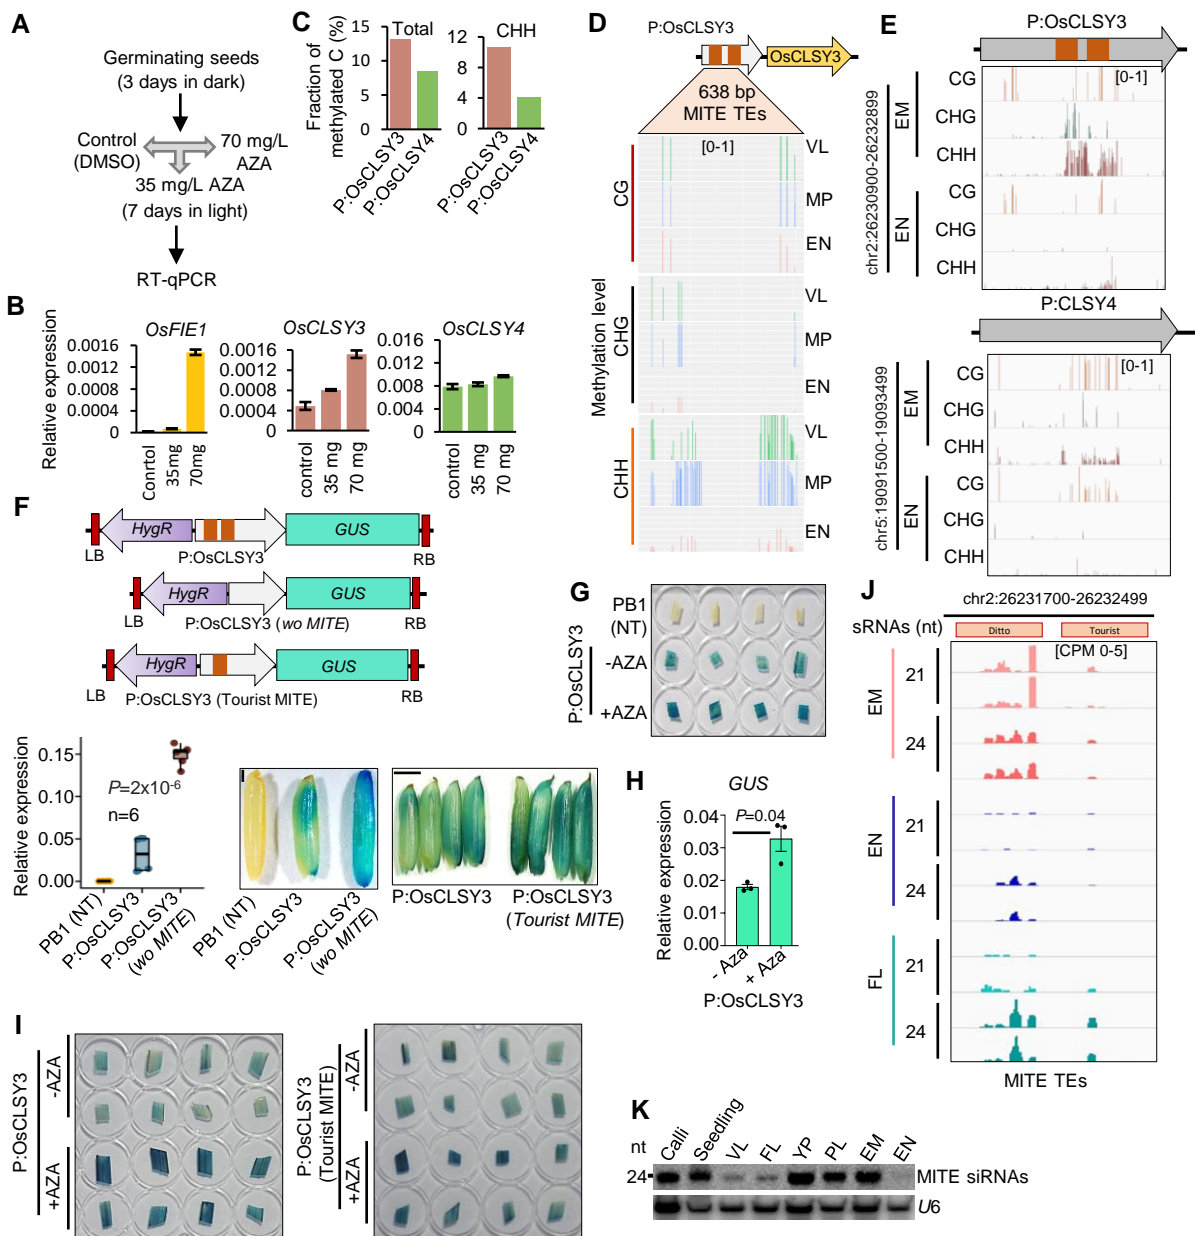

### Supplementary Figure 3. DNA methylation at MITE TEs controls expression of *OsCLS3Y3*.

(A) Scheme used for AZA treatment. (B) RT-qPCR showing relative expression of *OsCLS3Ys* and *OsFIE1*, normalised to *OsActin*. Data represents mean  $\pm$  SE. Experiment repeated at least twice with independent samples and consistent results were obtained. (C) Barplots showing total (left) and only CHH (right) DNA methylation status of 2 kb promoters of *OsCLS3Ys* in leaf (GSE130168). (D) Analysis of DNA methylation level of MITE TEs by targeted BS-PCR sequencing across tissues. (E) IGV screenshots showing DNA methylation status of 2kb promoters of *OsCLS3Ys* in EM and EN (GSE130122). MITE TEs are shown in brown boxes. (F) Linear maps of GUS reporter constructs with 1.1 kb native *OsCLS3Y3* promoter or 600 bp deletion of MITE TEs in its promoter (*wo MITE*), P:*OsCLS3Y3* (single MITE):GUS. NT-non-transgenic. Boxplots showing relative expression of GUS in transgenic panicles. Boxes show median values and interquartile range. Whiskers show minimum and maximum values, data points were represented as round dots. Comparisons were made with paired two-tailed Student's *t*-tests ( $P < 0.05$  was considered significant). Mature seeds showing levels of GUS (SB-1 mm) (N=5). Same P:*OsCLS3Y3* seed was also used in Fig.1H. (G) Image showing GUS expression in 10 d-old AZA treated seedlings (n=5). (H) Barplot showing GUS level upon AZA treatment. Experiments repeated twice. Comparisons were made with paired two-tailed Student's *t*-tests ( $P < 0.05$  was considered significant). (I) Images showing GUS expression in 10 d-old AZA treated seedlings in transgenic lines. (J) IGV screenshots showing MITE derived 21 nt and 24 nt sRNAs across different tissues. (K) Northern blot showing MITE derived sRNA levels across tissues. U6 served as loading control (PL-palea-lemma). Source data are provided as a Source Data file.

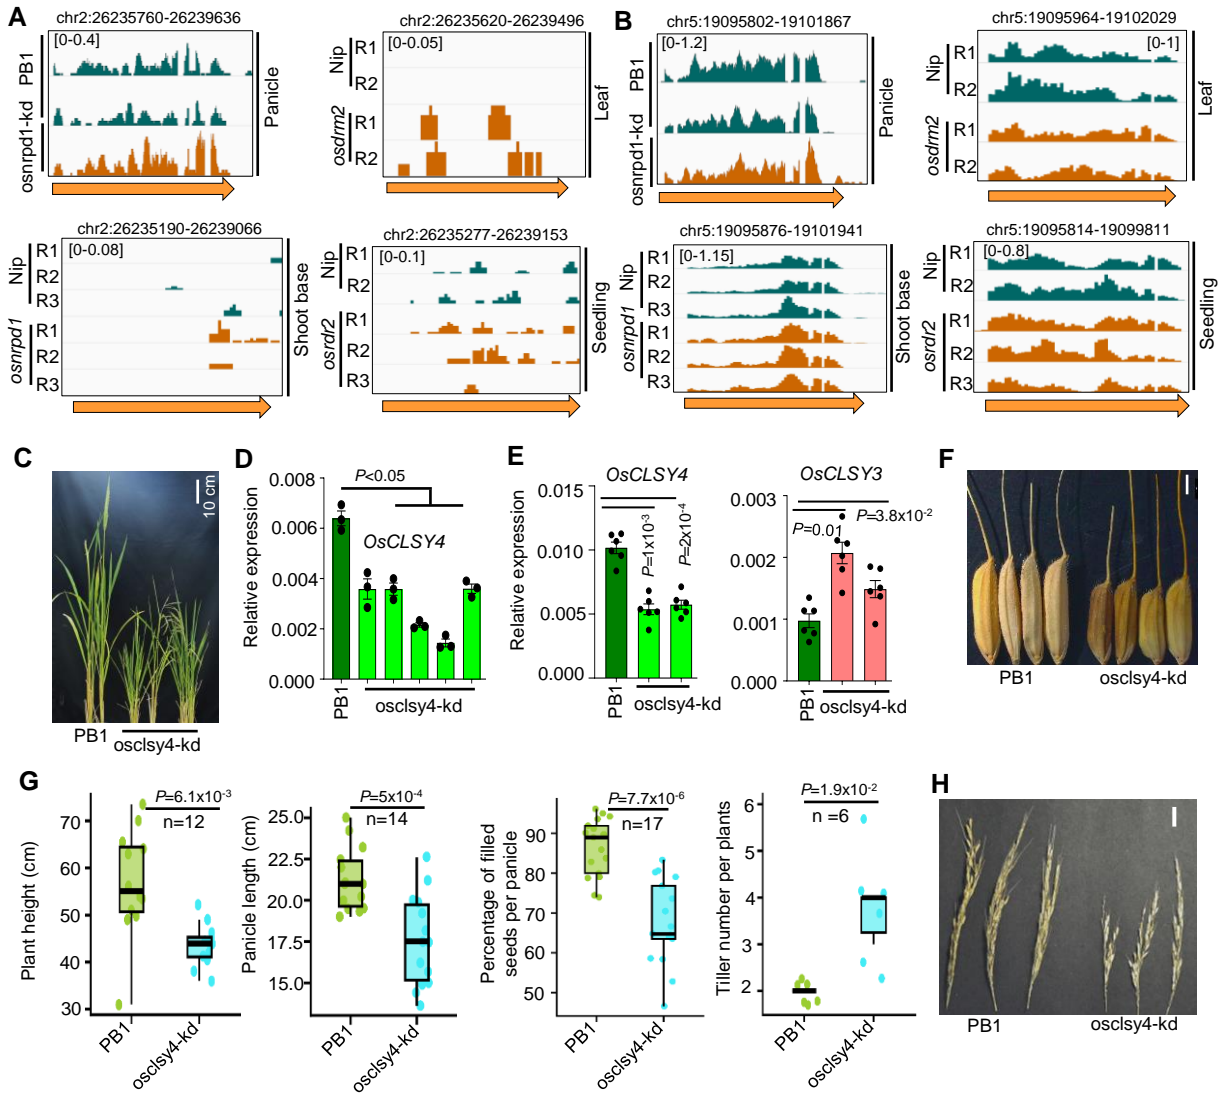

### Supplementary Figure 4. Expression of *OsCLS3* in different RdDM pathway mutants.

(A) and (B) IGV screenshots showing expression of *OsCLS3* and *OsCLS4* in different RdDM pathway mutants, respectively (GSE180457, GSE138705, GSE130165, GSE131319, *Nip-japonica* cultivar Nipponbare). (C) Image showing phenotype 90 d-old of *osclsy4-kd* plants. (D) Bar plot showing expression of *OsCLS4* in *osclsy4-kd* lines (60 d-old leaf). Data represents mean  $\pm$  SE of 5 independent transgenic lines with 3 technical replicates each. Comparisons were made with paired two-tailed Student's *t*-tests ( $P < 0.05$  considered significant). (E) Bar plot showing expression of *OsCLS4* (left) and expression of *OsCLS3* (right) in 5 d-old *osclsy4-kd* seedlings. (*OsActin* was used as internal control. Data represents mean  $\pm$  SE of 2 biological replicates with 6 technical replicates each. Comparisons were made with paired two-tailed Student's *t*-tests ( $P < 0.05$  was considered significant). (F) Image showing seed size of *osclsy4-kd*. Scale bar (SB)-1 mm. (G) Box plots showing plant height, panicle length, grain size filling percentage, tiller numbers of *osclsy4-kd* plants. Boxes show median values and interquartile range. Whiskers show minimum and maximum values, data points were represented as round dots. Comparisons were made with paired two-tailed Student's *t*-tests ( $P < 0.05$  was considered significant). (H) Image showing panicles of *osclsy4-kd* plants (SB-2 cm). Source data are provided as a Source Data file.

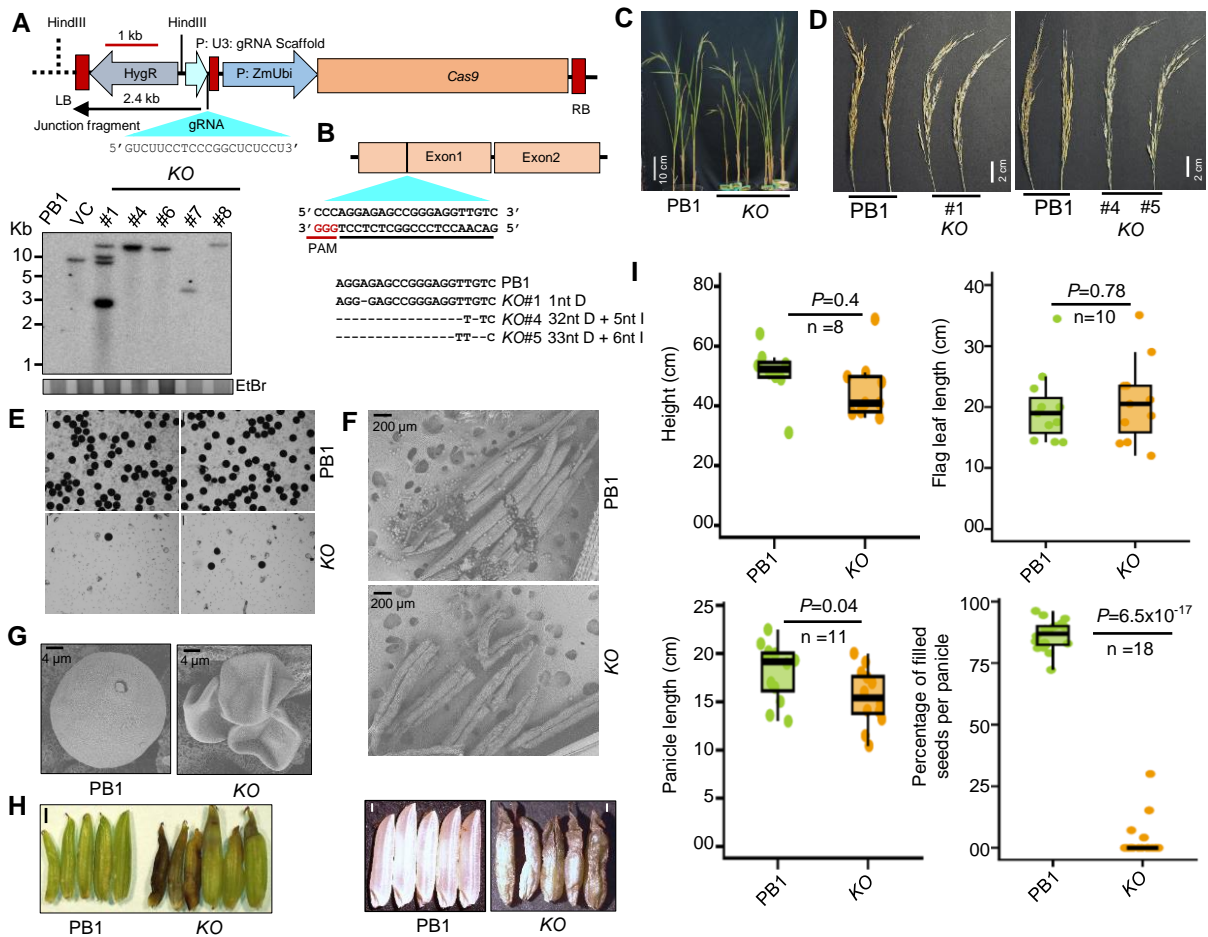

### Supplementary Figure 5. KO transgenic plants show reproductive abnormalities.

(A) Vector map of KO construct and DNA blots showing the T-DNA junction corresponding to digestion of DNA with mentioned restriction sites. Minimum lengths of junction fragments sizes are mentioned in the map. Probe region is shown in red line. VC- empty vector transformed line. (B) Schematic showing editing in guide RNA targeted region of *OsCLS3* gene in KO lines (D-deletion, I-insertion). (C) Image showing KO plants with equally grown PB1 plants. (D) Panicle morphology of KO lines. (E) Pollen viability assay of KO pollen (KO#4 and KO#5 used for the assay, Scale bar (SB)-50µm). (F) Anther and pollen morphology of KO under the electron microscope (KO#4). (G) Detailed pollen morphology of KO under the electron microscope. (H) Images showing EN morphology in KO (KO#1) seeds. SB-1mm. (I) Box plots representing various agronomic phenotypes measured in PB1 and KO plants. Boxes show median values and interquartile range. Whiskers show minimum and maximum values, data points were represented as round dots. Comparisons were made with paired two-tailed Student's *t*-tests ( $P < 0.05$  considered significant). Source data are provided as a Source Data file.



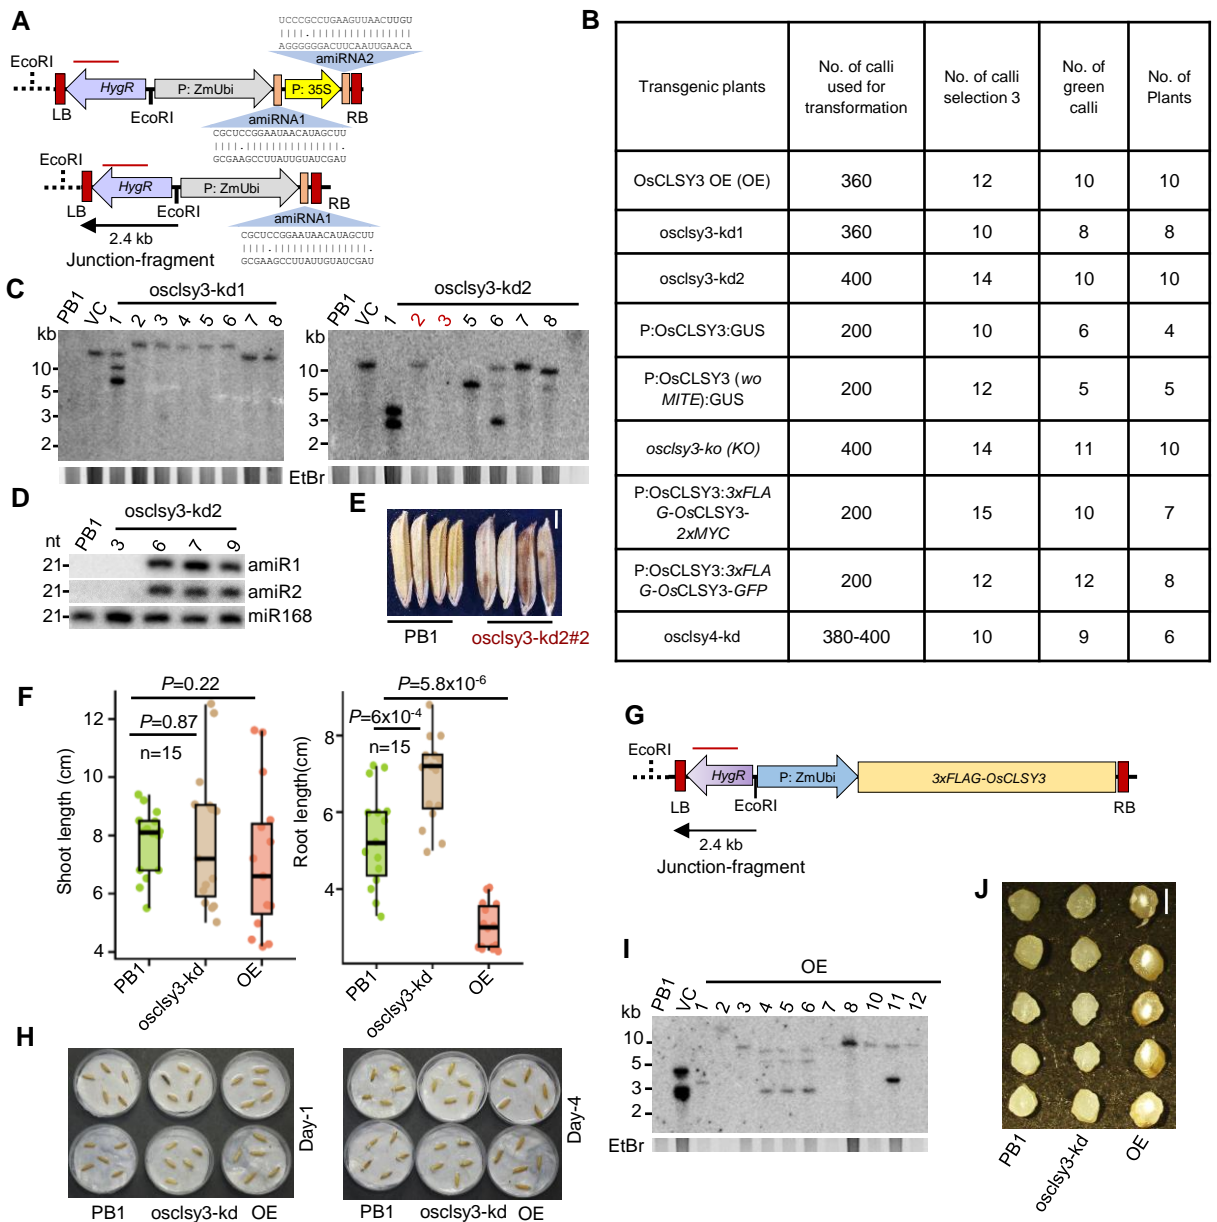

### Supplementary Figure 6. Validation of *OsCLSY3* transgenic lines.

(A) Vector maps of amiRNA constructs to target *OsCLSY3*. (B) Table showing approximate number of calli used and transgenic plants obtained in this study. (C) DNA blots showing the T-DNA junction corresponding to digestion of DNA with mentioned restriction sites. Minimum lengths of junction fragments sizes are mentioned in the map. Probe region is shown in red line. The line *osclsy3-kd2* #2 (brown) had proper T-DNA insertion. (D) Northern blots showing amiR expression in *osclsy3-kd* plants. The *osclsy3-kd2* #3 (marked in brown), did not express amiRs. (E) Image of *osclsy3-kd2* #2 seeds. SB-2mm. (F) Box plots showing the shoot and root lengths of 12 d-old *osclsy3-kd* and OE seedlings. Boxes show median values and interquartile range. Whiskers show minimum and maximum values, data points were represented as round dots. Comparisons were made with paired two-tailed Student's *t*-tests ( $P < 0.05$  was considered significant). (G) Vector map of OE construct. (H) Images showing seed germination in rice *CLSY3* mis-expression lines. (I) Southern blots confirming OE transgenic lines. T-DNA junction fragment length upon digestion with *EcoRI* is shown in G. VC-vector control. (J) Cross sections of dry *osclsy3-kd* and OE EN (SB-1 mm). Source data are provided as a Source Data file.

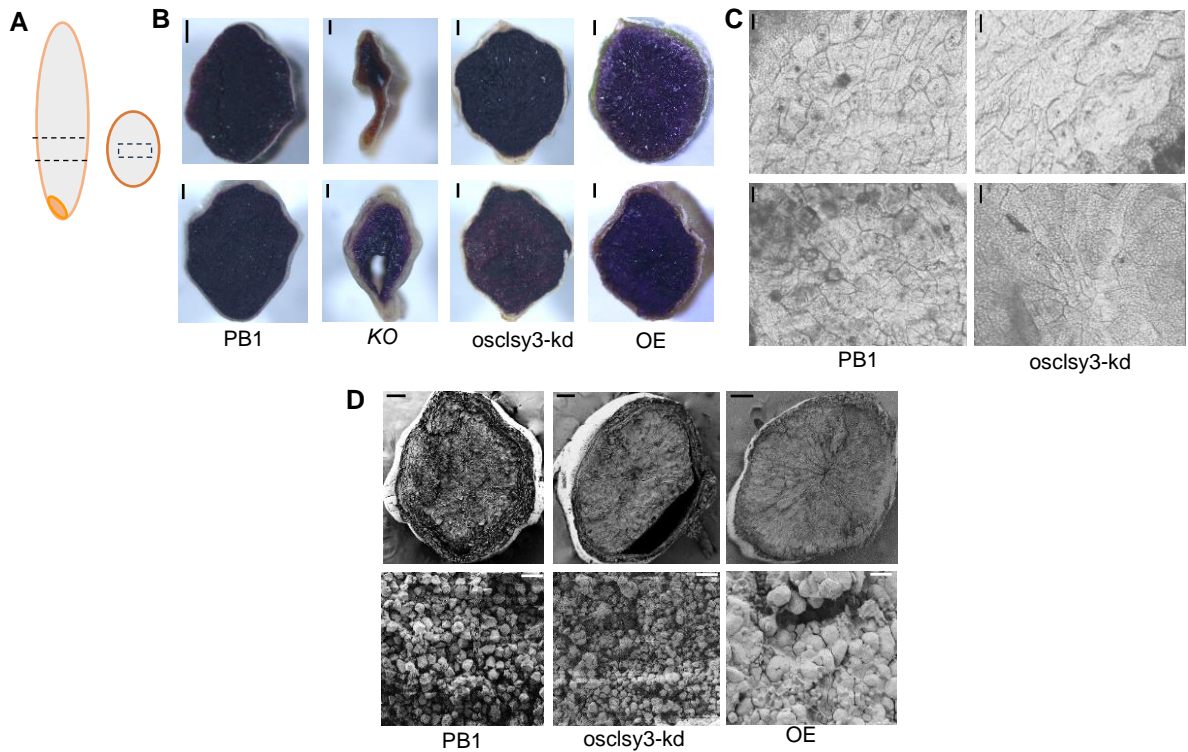

**Supplementary Figure 7. Endosperm morphology of *OsCLS3* transgenic lines.**

(A) Schematic showing sections used for imaging EN (dotted lines indicate sections used for imaging). (B) Images showing manually dissected EN (SB-1 mm) (15 DAP). (C) Images showing 50 μm cross-section of EN (10 DAP). (D) Morphology of EN cross section under SEM (15 DAP). SB-200 μm (top) and 10 μm (bottom). Source data are provided as a Source Data file.



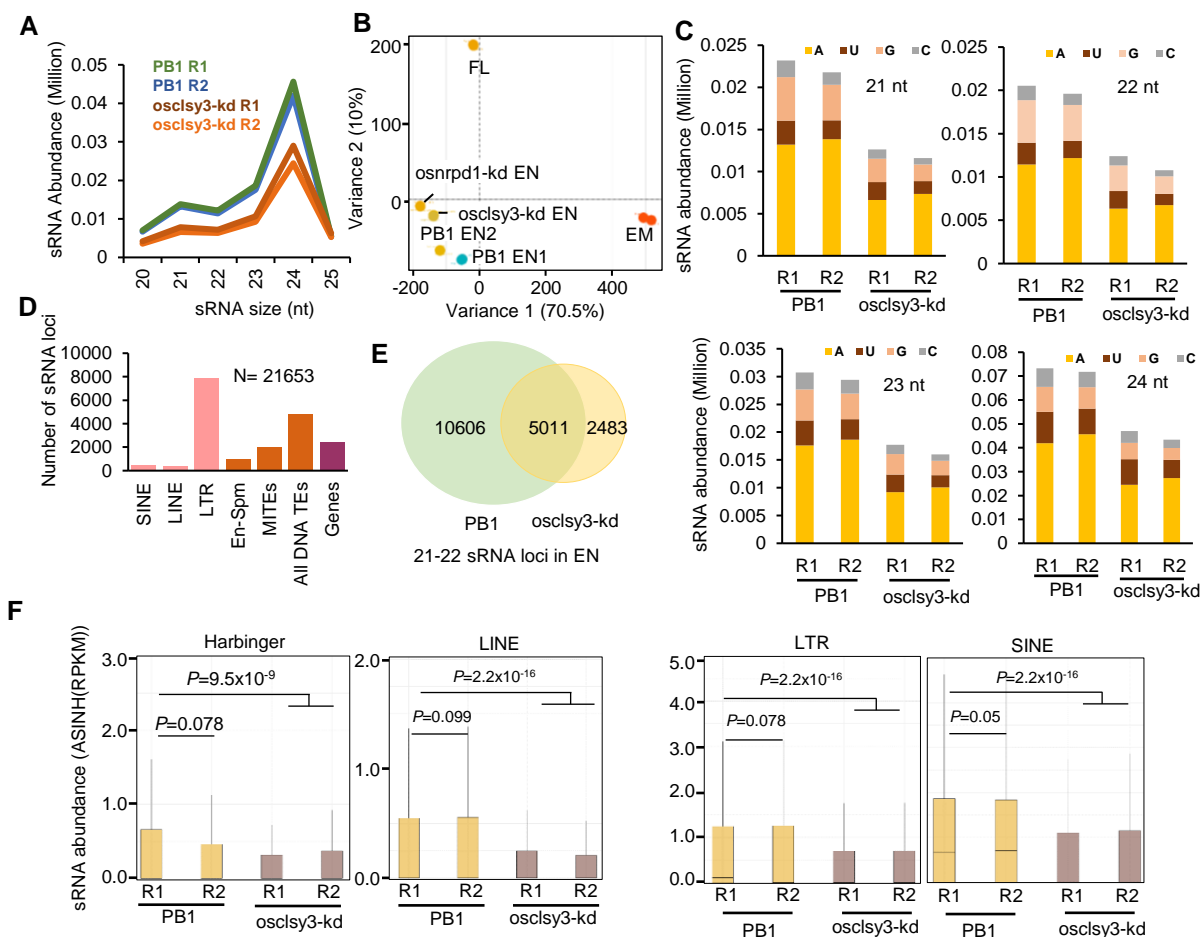

### Supplementary Figure 8. Endosperm sRNAs are globally reduced in osclsy3-kd.

(A) Plot showing mapped sRNA abundance (20-25 nt) in EN. (B) PCA plot comparing the mapped sRNAs (23-24 nt) across different tissues and genotypes. osnrpd1-kd EN (16-20 DAP) dataset is GSE180456. (PB1 EN2-GSE180456). (C) Stacked barplot showing abundance of first 5' nucleotide of mapped sRNAs in PB1 and osclsy3-kd EN. (D) Barplot showing number of different TEs and genes overlapped with CLSY3-dependent sRNA loci. (E) Venn diagram showing status of 21-22 nt sRNAs in osclsy3-kd EN. (F) Boxplots representing normalised sRNA reads across different class I TEs and class II TEs in PB1 and osclsy3-kd EN. Boxes show median values and interquartile range. Whiskers show minimum and maximum values, excluding outliers. Comparisons were made with two-sided Wilcoxon test ( $P < 0.01$  was considered significant). Source data are provided as a Source Data file.

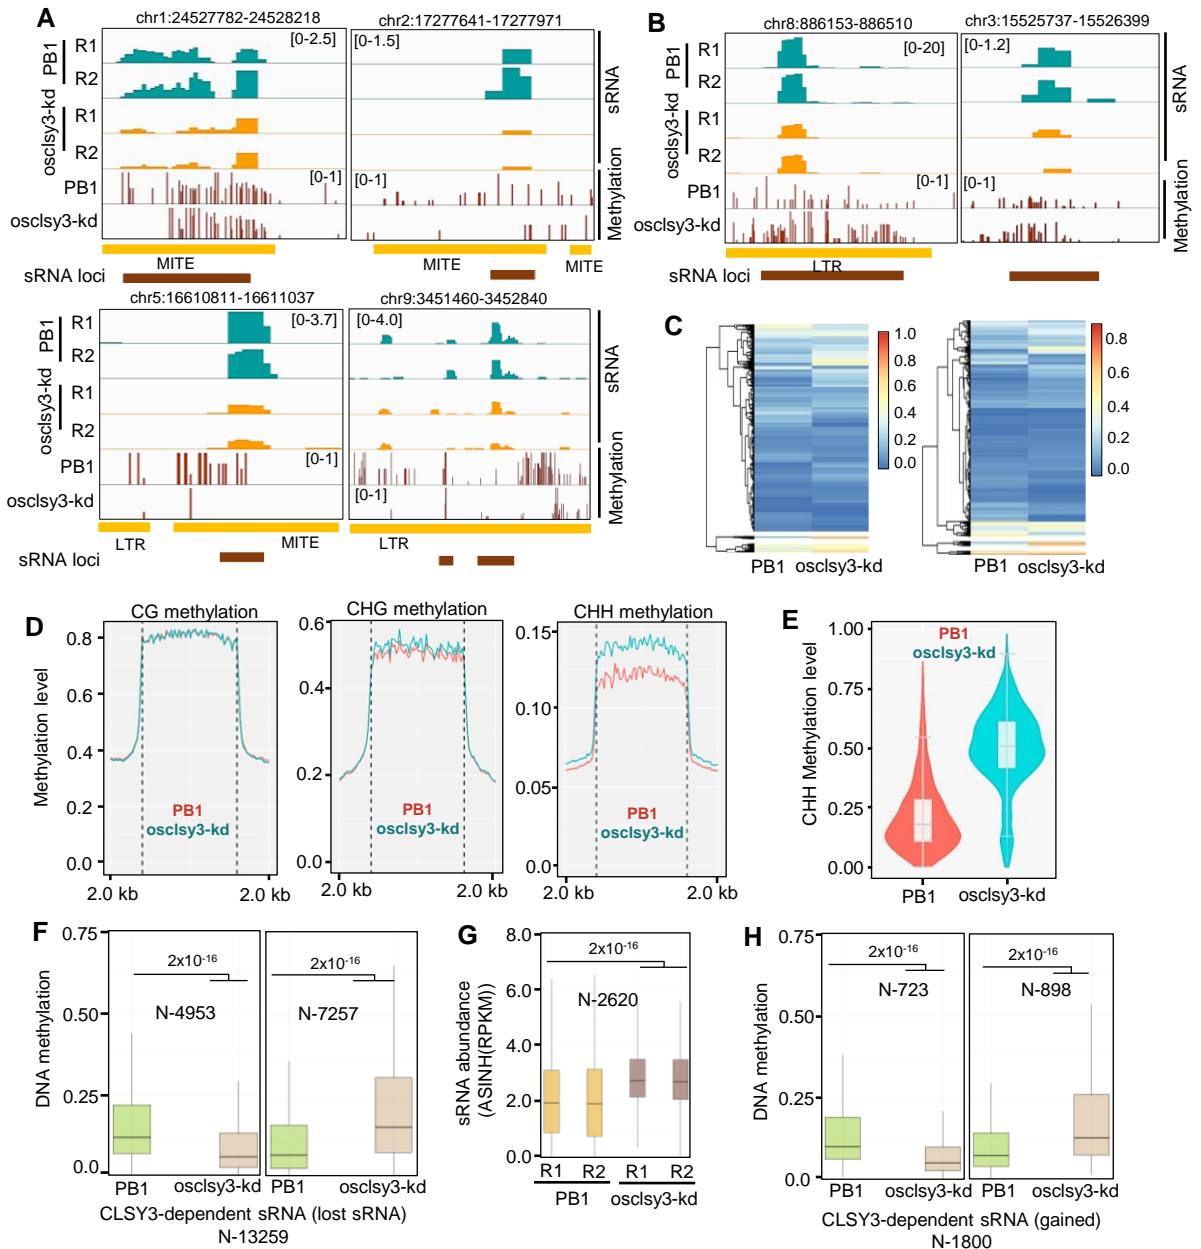

### Supplementary Figure 9. Whole genome DNA methylation analysis in *osclsy3-kd* endosperm.

(A) IGV screenshots showing sRNA (sRNA-seq) and CHH methylation (methylome) across selected loci in PB1 and *osclsy3-kd* EN. (B) IGV screenshots showing sRNA and CHH methylation status of hypermethylated loci in PB1 and *osclsy3-kd* EN. (C) Heatmap showing DNA methylation status of CLSY3-dependent sRNA loci (lost sRNA-left, gain-right) in CHH context. (D) Metaplots showing DNA methylation in CLSY3-dependent sRNA loci (lost sRNA) in CG, CHG and CHH contexts in PB1 and *osclsy3-kd* EN. (E) Violin plot showing DNA methylation across CLSY3-dependent sRNA loci (lost sRNA) in CHH context. (F) Box plots showing methylation status of CLSY3-dependent sRNA (lost sRNA) loci in CHH context. (G) Box plot showing sRNA status of 2620 CLSY3-dependent gained sRNA loci. (H) Box plots showing methylation status of CLSY3-dependent sRNA (gained sRNA) loci in CHH context. In (F), (G) and (H), boxes show median values and interquartile range. Whiskers show minimum and maximum values, excluding outliers. Comparisons were made with two-sided Wilcoxon test ( $P < 0.01$  was considered significant). Source data are provided as a Source Data file.

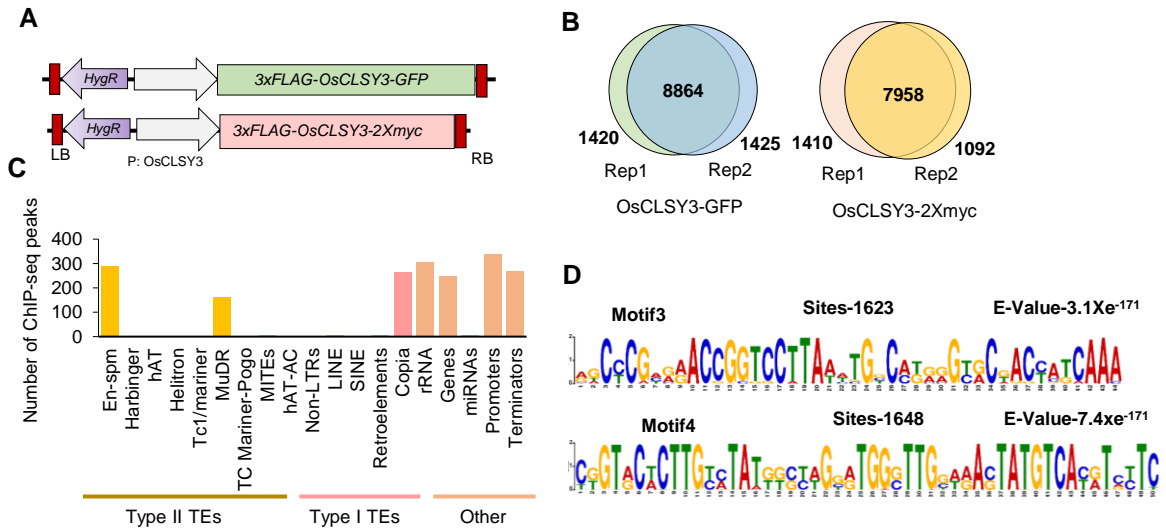

### Supplementary Figure 10. OsCLSY3-ChIP analysis.

(A) Linear maps of OsCLSY3 epitope tagged constructs driven by OsCLSY3 native promoter. (B) Venn diagrams showing overlap between replicates of ChIP-seq peaks in two different OsCLSY3 tagged lines. (C) Enrichment of OsCLSY3 ChIP-seq peaks across different genomic features. (D) Less conserved OsCLSY3-bound sequence-specific motifs. Source data are provided as a Source Data file.

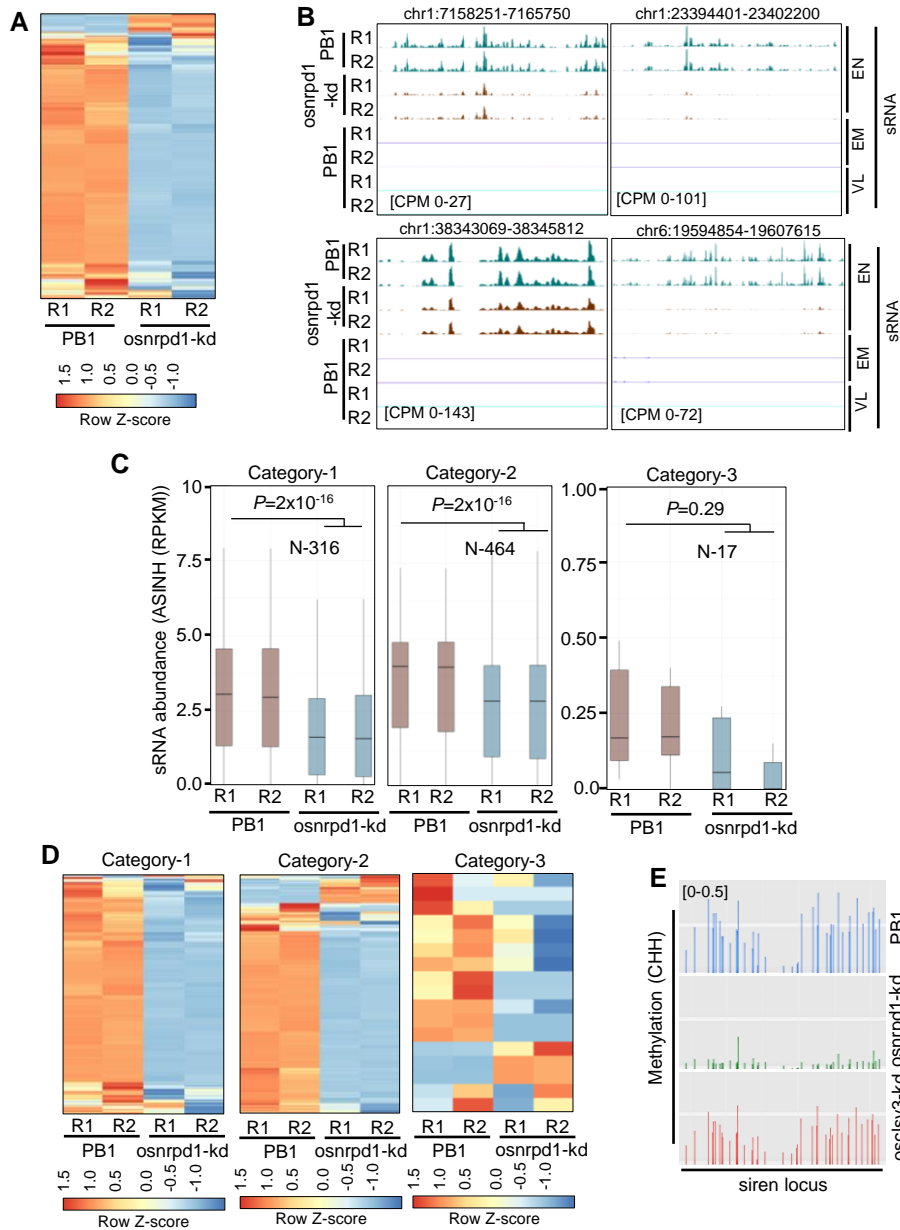

### Supplementary Figure 11. RdDM pathway regulates expression of siren loci in rice.

(A) Heatmap showing expression of siren sRNAs (23-24 nt) in *osnrpd1-kd* EN. Row Z-score was plotted (N-797 loci). (B) IGV screenshot representing sRNA levels (23-24 nt) in some selected siren loci in *osnrpd1-kd* EN. (C) Boxplots showing expression of siren loci in *osnrpd1-kd* EN (category wise). Boxes show median values and interquartile range. Whiskers show minimum and maximum values excluding outliers. Comparisons were made with two-sided Wilcoxon test ( $P < 0.01$  was considered significant). (D) Heatmaps showing expression of siren loci in *osnrpd1-kd* EN (category wise). (E) BS-PCR showing DNA methylation status of selected siren locus in *osclsy3-kd* and *osnrpd1-kd* EN. Source data are provided as a Source Data file.

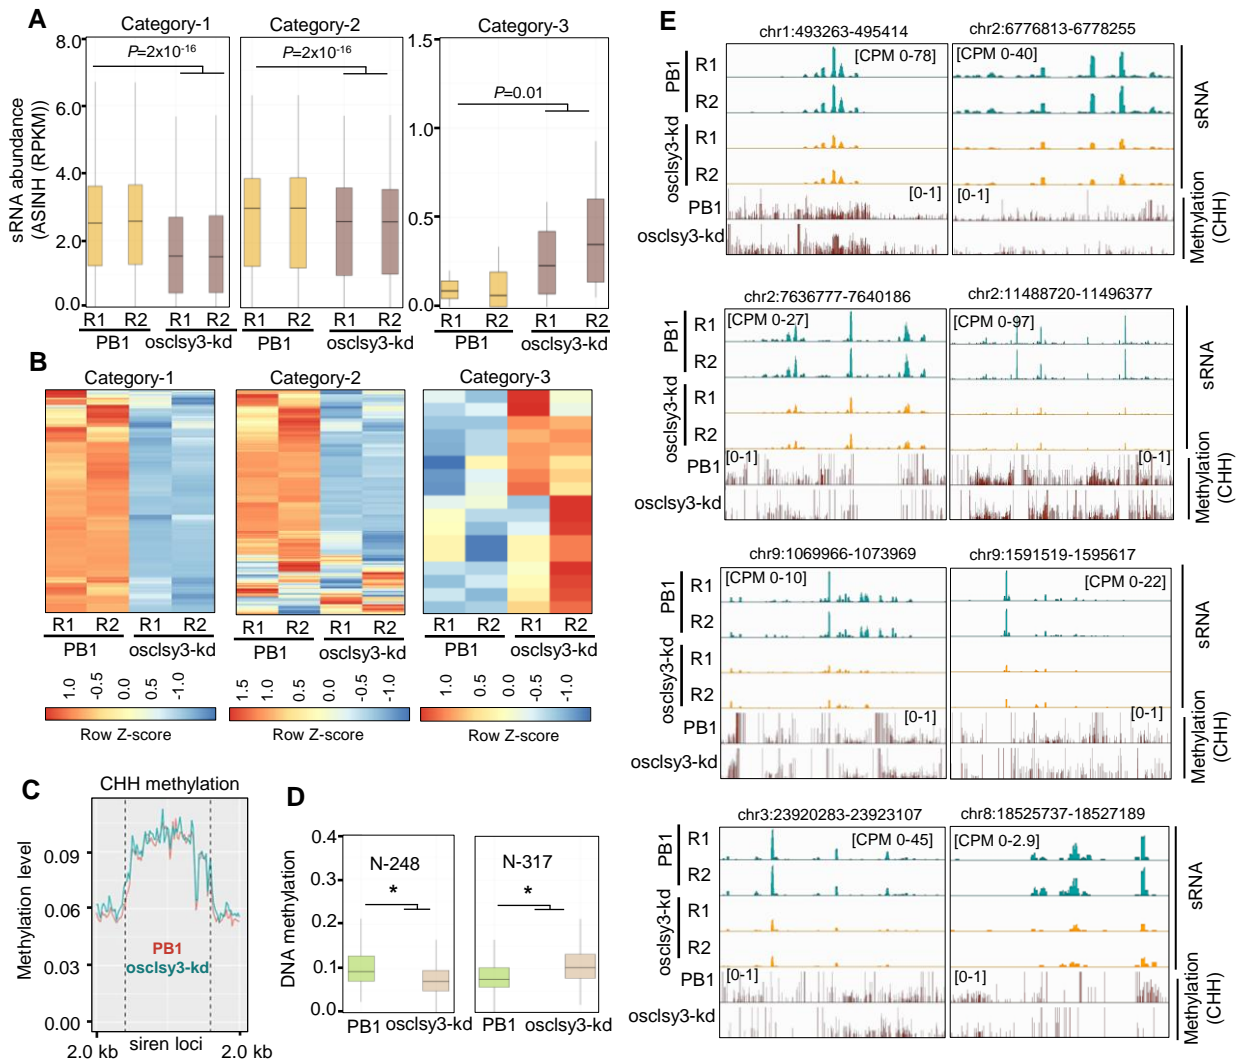

### Supplementary Figure 12. The OsCLS3Y3 regulates expression of siren RNAs in rice.

(A) Boxplots showing expression of siren RNAs (23-24 nt) in osclsy3-kd EN. Row Z-score was plotted. (B) Heatmap showing expression of siren RNAs in 3 categories. (C) Metaplot showing DNA methylation status of all siren loci in rice (CHH context). (D) Boxplots showing hypomethylated (left) and hypermethylated (right) siren loci in osclsy3-kd EN (CHH context). Boxes show median values and interquartile range. Whiskers show minimum and maximum values excluding outliers. Comparisons were made with two-sided Wilcoxon test ( $P < 0.01$  considered significant). (E) IGV screenshots showing sRNA expression and DNA methylation status of a few siren loci in osclsy3-kd EN. Source data are provided as a Source Data file.



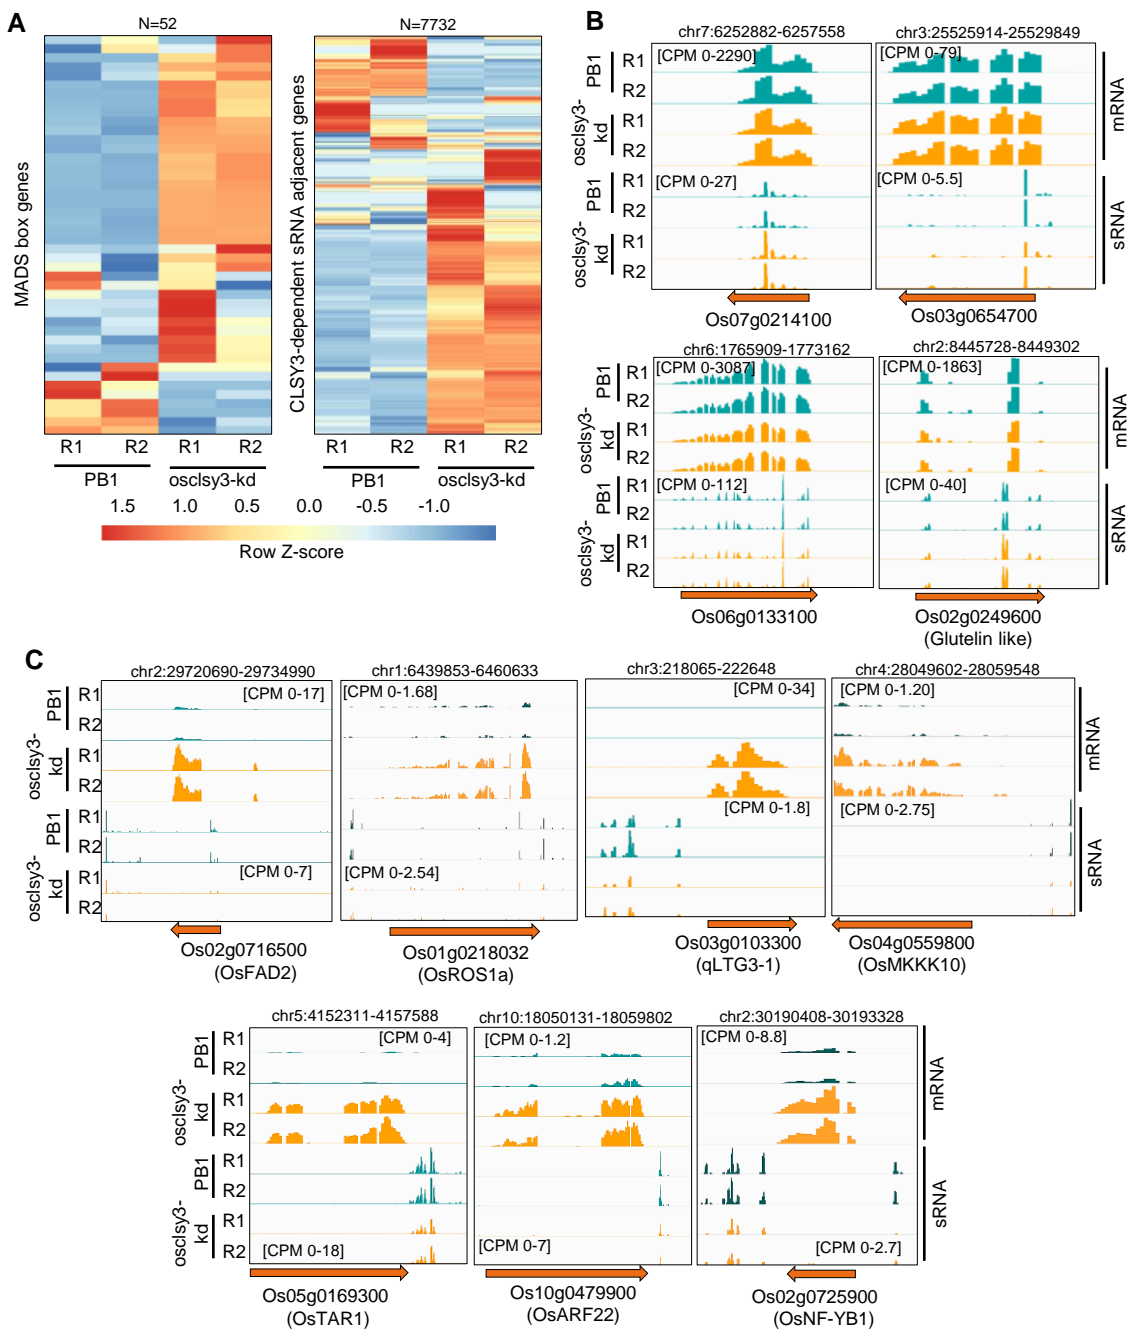

**Supplementary Figure 13. OsCLSY3-dependent sRNAs regulate protein coding genes.**

(A) Heatmap showing MADS box and CLSY3-dependent sRNA adjacent genes in *osclsy3-kd* EN. Row Z-score was plotted. (B) IGV screenshots showing four control genes in which sRNA and mRNA levels unaltered in *osclsy3-kd* EN. (C) IGV screenshots showing expression of few selected seed development and yield related genes in *osclsy3-kd* EN. Source data are provided as a Source Data file.

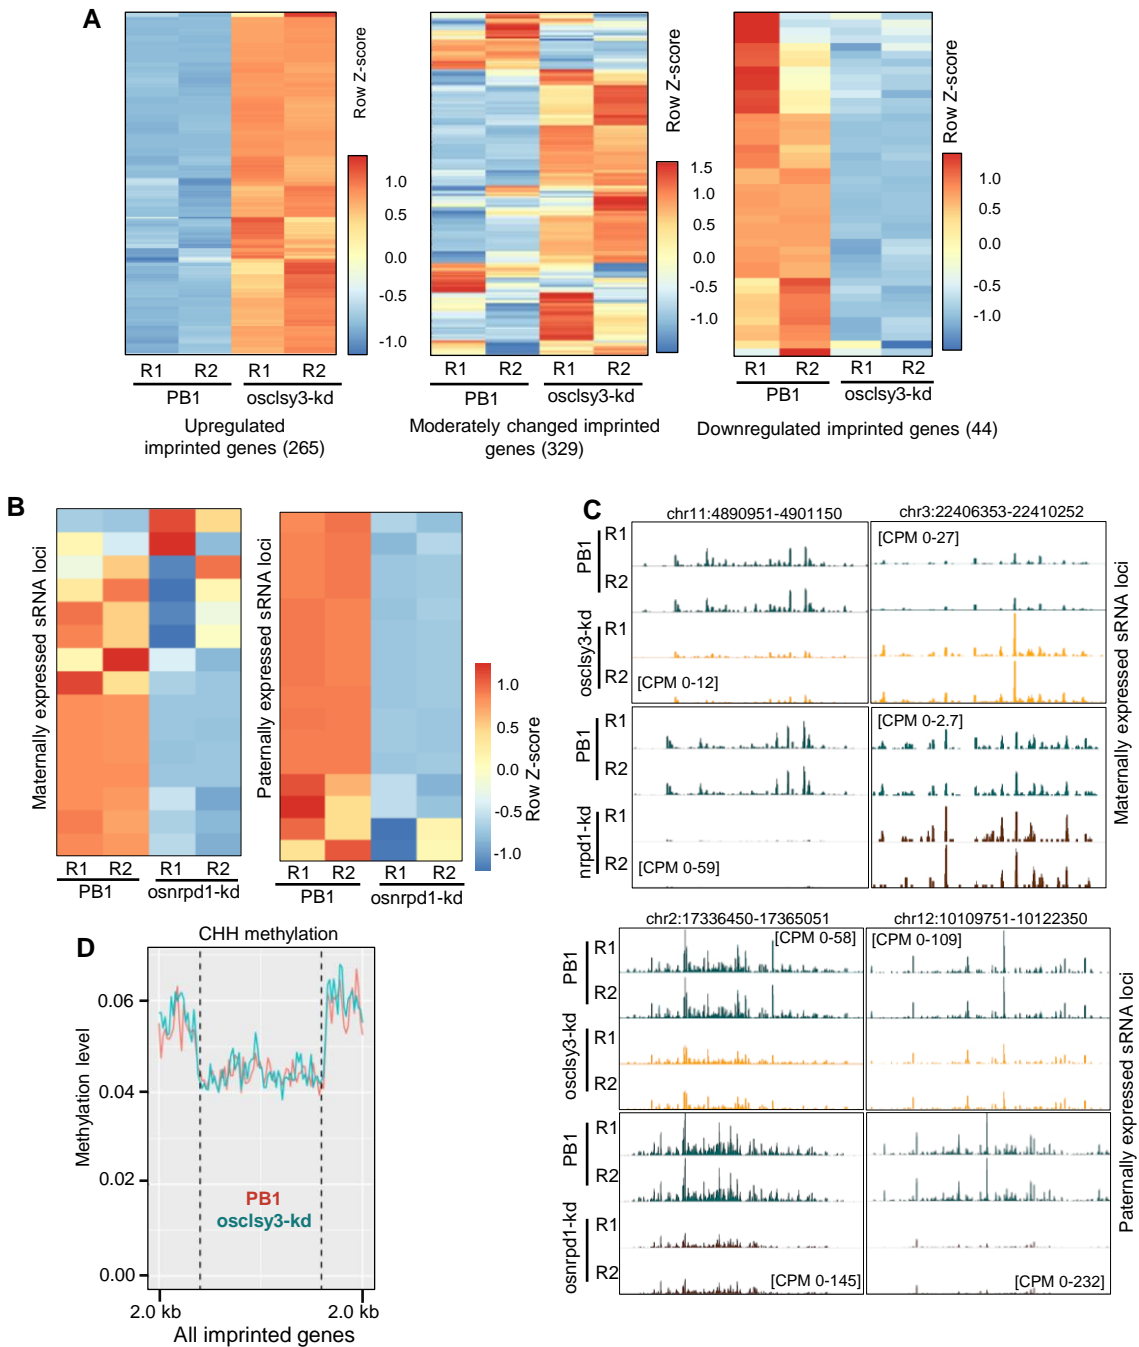

**Supplementary Figure 14. Imprinted genes and imprinted sRNAs are regulated by OsCLS3.**

(A) Heatmap showing expression of imprinted genes *osclsy3-kd* EN. Row Z-score was plotted. (B) Heatmap showing expression of imprinted sRNAs loci in *osnrpd1-kd* EN. Row Z-score was plotted. (C) IGV screenshots representing expression of imprinted sRNAs (23-24 nt) in *osnrpd1-kd* and *osclsy3-kd* EN. (D) Metaplot showing DNA methylation of all imprinted genes in *osclsy3-kd* EN in CHH context. Source data are provided as a Source Data file.

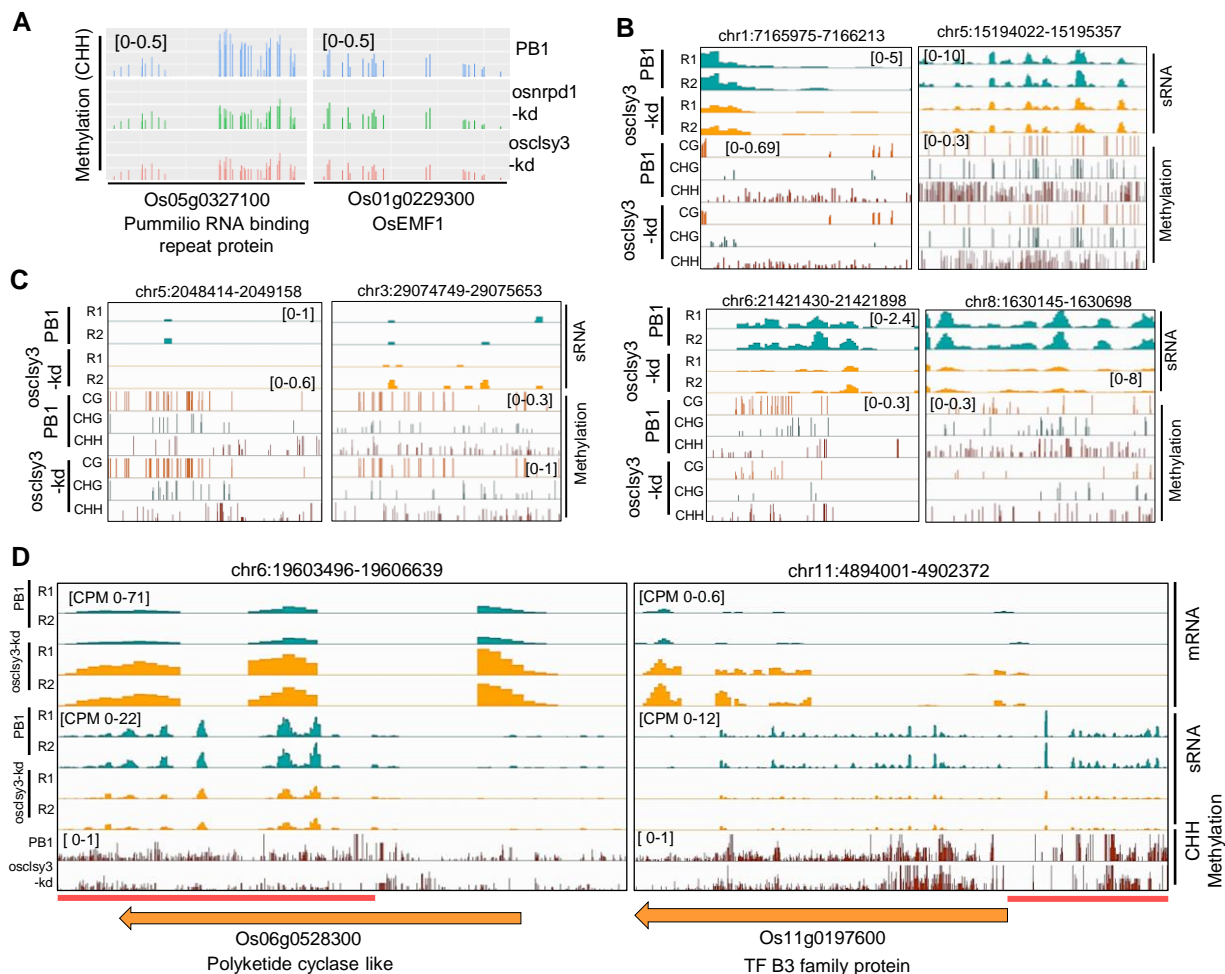

**Supplementary Figure 15. DNA methylation level in selected imprinted genes adjacent to imprinted sRNA loci.**

(A) BS-PCR showing DNA methylation status of two imprinted genes. (B) IGV screenshots showing sRNA and DNA methylation status of selected regions of imprinted sRNA loci used in chop-PCR analysis. (C) IGV screenshots showing DNA methylation of *OsActin* and a control locus. (D) IGV screenshots showing DNA methylation, sRNA and mRNA expression of two selected imprinted genes. Red lines indicate hypomethylated regions. Source data are provided as a Source Data file.

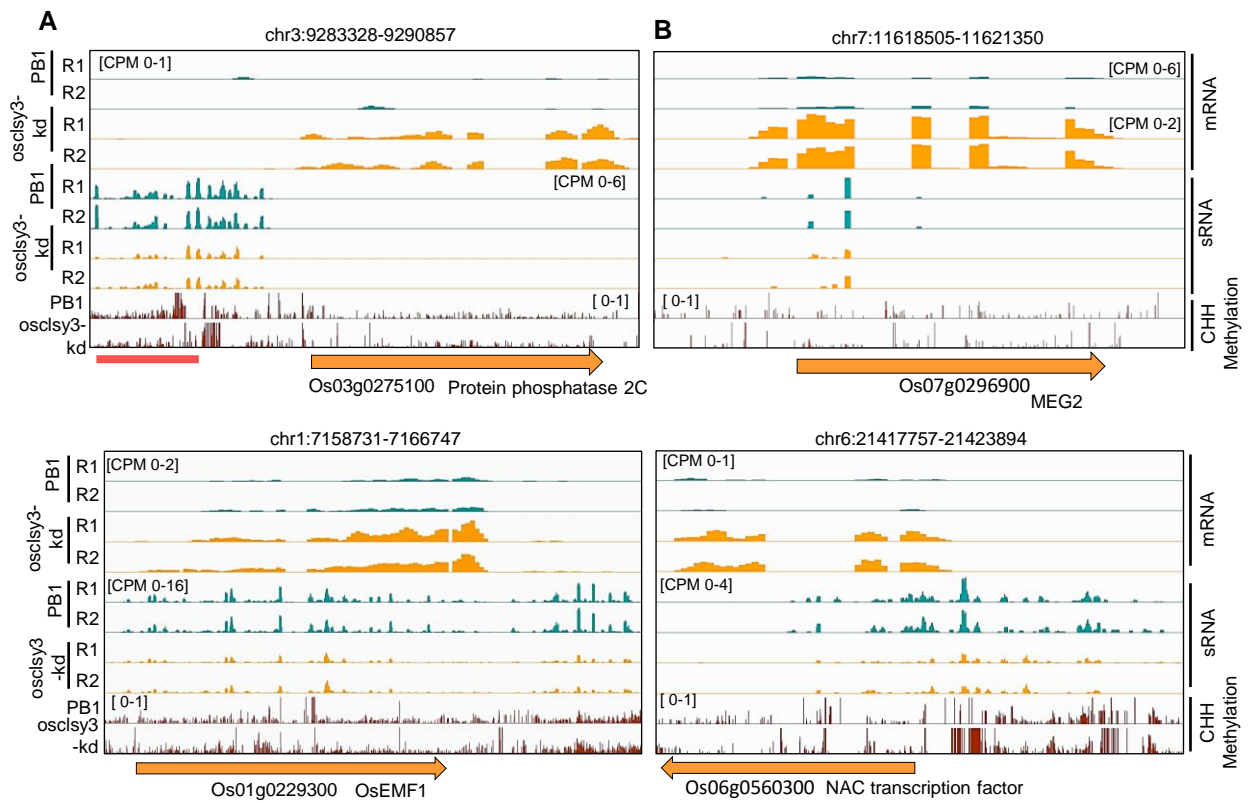

**Supplementary Figure 16. DNA methylation levels across selected imprinted genes in *osclsy3-kd* endosperm.**

(A) IGV screenshots showing RNA, sRNA and DNA methylation status of an imprinted gene *Os03g0275100* (red line - hypomethylated region). (B) IGV screenshots showing mRNA, sRNA and DNA methylation status of imprinted genes in which DNA methylation is either not changed or redistributed. Source data are provided as a Source Data file.

Supplementary Table 1: Details of high-throughput genomics data generated in this study

| Sl. No | Dataset type       | Genotype                    | Replicate | Source tissue             | GSM Number | GSE Number | Total number of mapped reads obtained | Sequencing mode   |
|--------|--------------------|-----------------------------|-----------|---------------------------|------------|------------|---------------------------------------|-------------------|
| 1      | Small RNA-seq      | WT (PB1)                    | Rep1      | 20 days Endosperm         | GSM7181918 | GSE229958  | 39570183                              | Single end 50bp   |
| 2      | Small RNA-seq      | WT (PB1)                    | Rep2      | 20 days Endosperm         | GSM7181919 | GSE229958  | 29825291                              | Single end 50bp   |
| 3      | Small RNA-seq      | osclsy3-kd                  | Rep1      | 20 days Endosperm         | GSM7181916 | GSE229958  | 41731266                              | Single end 50bp   |
| 4      | Small RNA-seq      | osclsy3-kd                  | Rep2      | 20 days Endosperm         | GSM7181917 | GSE229958  | 26694590                              | Single end 50bp   |
| 5      | Small RNA-seq      | WT (PB1)                    | Rep1      | 25 days Embryo            | GSM7181920 | GSE229958  | 34720489                              | Single end 50bp   |
| 6      | Small RNA-seq      | WT (PB1)                    | Rep2      | 25 days Embryo            | GSM7181921 | GSE229958  | 29840669                              | Single end 50bp   |
| 5      | RNA-seq            | WT (PB1)                    | Rep1      | 20 days Endosperm         | GSM7181930 | GSE229959  | 12941016                              | Paired end 100bp  |
| 6      | RNA-seq            | WT (PB1)                    | Rep2      | 20 days Endosperm         | GSM7181931 | GSE229959  | 14608494                              | Paired end 100bp  |
| 7      | RNA-seq            | osclsy3-kd                  | Rep1      | 20 days Endosperm         | GSM7181928 | GSE229959  | 13857932                              | Paired end 100bp  |
| 8      | RNA-seq            | osclsy3-kd                  | Rep2      | 20 days Endosperm         | GSM7181929 | GSE229959  | 13461363                              | Paired end 100bp  |
| 9      | RNA-seq            | Embryo                      | Rep1      | 25 days Embryo            | GSM7181922 | GSE229959  | 44252442                              | Paired end 100bp  |
| 10     | RNA-seq            | Embryo                      | Rep2      | 25 days Embryo            | GSM7181923 | GSE229959  | 32808865                              | Paired end 100bp  |
| 11     | RNA-seq            | Endosperm                   | Rep1      | 25 days Endosperm         | GSM7181924 | GSE229959  | 35622255                              | Paired end 100bp  |
| 12     | RNA-seq            | Endosperm                   | Rep2      | 25 days Endosperm         | GSM7181925 | GSE229959  | 30799873                              | Paired end 100bp  |
| 13     | RNA-seq            | Endosperm                   | Rep1      | 15 days Endosperm         | GSM7181926 | GSE229959  | 37858782                              | Paired end 100bp  |
| 14     | RNA-seq            | Endosperm                   | Rep2      | 15 days Endosperm         | GSM7181927 | GSE229959  | 33080996                              | Paired end 100bp  |
| 15     | Targeted bisulfite | WT Leaf (PB1)               | NA        | 60 days Leaf              | GSM7181933 | GSE229960  | 1031542                               | Paired end 100bp  |
| 16     | Targeted bisulfite | WT Panicle (PB1)            | NA        | Mature panicle (12-15 cm) | GSM7181934 | GSE229960  | 1074742                               | Paired end 100bp  |
| 17     | Targeted bisulfite | WT (PB1) Endosperm          | NA        | 20 days Endosperm         | GSM7181932 | GSE229960  | 1166935                               | Paired end 100bp  |
| 18     | Targeted bisulfite | Untreated DNA               | NA        | Untreated Leaf DNA        | GSM7181935 | GSE229960  | 925634                                | Paired end 100bp  |
| 19     | Targeted bisulfite | WT (PB1) Endosperm (TEs)    | NA        | 20 days Endosperm         | GSM7181936 | GSE229960  | 991160                                | Paired end 100bp  |
| 20     | Targeted bisulfite | osclsy3-kd Endosperm (TEs)  | NA        | 20 days Endosperm         | GSM7181937 | GSE229960  | 961552                                | Paired end 100bp  |
| 21     | Bisulfite-Seq      | WT (PB1) Endosperm          | NA        | 20 days Endosperm         | GSM8121738 | GSE260651  | 18706477                              | Paired end 150 bp |
| 22     | Bisulfite-Seq      | osclsy3-kd Endosperm        | NA        | 20 days Endosperm         | GSM8121739 | GSE260651  | 15268917                              | Paired end 150 bp |
| 23     | Targeted bisulfite | osclsy4-kd Leaf             | NA        | 60 days Leaf              | GSM8121725 | GSE260648  | 779686                                | Paired end 100bp  |
| 24     | Targeted bisulfite | osclsy3-kd EN (Genes,siren) | NA        | 20 days Endosperm         | GSM8121722 | GSE260648  | 948357                                | Paired end 100bp  |
| 25     | Targeted bisulfite | WT EN (PB1) (Genes,siren)   | NA        | 20 days Endosperm         | GSM8121724 | GSE260648  | 692822                                | Paired end 100bp  |



|    |                    |                             |      |                         |            |           |          |                  |
|----|--------------------|-----------------------------|------|-------------------------|------------|-----------|----------|------------------|
| 26 | Targeted bisulfite | osnrpd1-kd EN (Genes_siren) | NA   | 20 days Endosperm       | GSM8121723 | GSE260648 | 787135   | Paired end 100bp |
| 27 | ChIP-seq           | OsCLSY3-GFP                 | Rep1 | Panicle before anthesis | GSM8121726 | GSE260649 | 6139543  | Paired end 100bp |
| 28 | ChIP-seq           | OsCLSY3-GFP                 | Rep2 | Panicle before anthesis | GSM8121727 | GSE260649 | 6247648  | Paired end 100bp |
| 29 | ChIP-seq           | OsCLSY3-2XMYC               | Rep1 | Panicle before anthesis | GSM8121728 | GSE260649 | 3837279  | Paired end 100bp |
| 30 | ChIP-seq           | OsCLSY3-2XMYC               | Rep2 | Panicle before anthesis | GSM8121729 | GSE260649 | 3542186  | Paired end 100bp |
| 31 | ChIP-seq           | INPUT                       | Rep1 | Panicle before anthesis | GSM8121730 | GSE260649 | 22074726 | Paired end 100bp |
| 32 | ChIP-seq           | INPUT                       | Rep2 | Panicle before anthesis | GSM8121731 | GSE260649 | 19555683 | Paired end 100bp |
| 33 | Imprinting study   | OsARF22 and OsSHH1          | NA   | 10 days Endosperm       | GSM8121720 | GSE260647 | 951812   | Paired end 100bp |
| 34 | Imprinting study   | OsCLSY3                     | NA   | 10 days Endosperm       | GSM8121721 | GSE260647 | 54474    | Paired end 300bp |



GNDRRLPFQDSSVDFVFAARALDSSKRPADLAAESARILKPDGHLVVLTTSAADAFSLRALQALLPSL  
RLLRSRQIKGPDDSTLRELVFQKIQDSTDDPVNKCTIGDHKLQLLTHAEPLIQEPRKPWITLKRNIKNI  
KYLPTLADISFKRNYVYVDVGARSYGSSIGSWFRKHYPKQNHFFQVFAIEADPAFHSEYAAKAVTLL  
PYAAWVKNETLNFEINADPGKEDEAKANGRGMGRIRPMAGKKMSGEVRSVPAFDFAEWLKRTVSE  
QDYVVMKMDVEGTEFDLIPRLFDTGAICLIDELFLECHYNRWQKCCPDRAEAFEMAKGVSCFYWSIQ  
FPNFKDHLCFRNCNASSTRHFSYRSLIRTEKPVTTNRHAYAEVVVFLDQNPMMFFLFRFFYPAIQ  
RGPNCWSSANSTVMRQAFEVFYDGSWHGVNCIRIRNGNLFVKFIYSGSTVEHNVDGDCLRLRSRA  
TCSDCSNVLKPGVDVCVQSSHTPEASSQGGTNASVLLRHDARLITIKKNHQEDKCLCLFVVILYKNQC  
PGNAEKVITDRRAEVVINDIFLLQKLQPEVHEGSMKWSFSKDRLSLNKGR LISARFSSEITHLIVLSILR  
GMEFNILVEGQIVYQIIKGDQAQWNLDSMAIPPGFGNTMEIISFQLRDEALRPTITNIPITHVKKNNITE  
DMRFTVKSEMDSELDRALDVEILYEHVDLRRSKRLKTQPDRFTSYDTPRFLSGYKKEASSPTKHV  
RGAVHCDSPVDDSKKEVESCCVEIPGNVTQKQTVHSPMVDEKSNSEPGQHKNTRTTCSLVKEK  
ASSPEGQHEKTTKRTTCALPVKEKASSPEGQHKNTRTTCSLPVKEEPSSVEIEEKSSKEQSAPEFH  
IPRTPAQNKEKHNRPPFCKPKLFTSSGLGVNCEPAFCQKVGGRKRHRMCEREYKQMIDQCIGNIE  
SEMERDSMFNFDANMMNYVQHSYREEDFTWPPSADNQEVEEDELEELWKEMDYSLTTLALLEQKQ  
VMAQSRINMLVDNFDGLRLDCLTLTDDYRCYYQKKEKFAESGSVNESTDYFGKVGGPCHHECILDE  
ELGLACRLCNVCTEAKDIFPEMFNGNDYKDRPGCSNICLDDILDPSLLANLAPELSELKNSGSVWS  
AISDLDPKLLPHQRKALDFLWKNLAGSIQVEGMDNSNVSTGGCVIAHTPGSGKTLLLISFLVSYMKAH  
PRSRPLVLTPKAAIHTWKREFEKWGISLPLHVFHHRNRSGKPLGAMDSKLRSLNNFHRPTWTNMR  
MDSLDKLFWHAHPSVLLMTYSSFLGMTKQDSKVRNRYREFIAEVLMMNPGLLILDEGHNPRSNKSK  
LRKLLMKVKTEFRILLSGTAFQNNFEEYFNTLCLARPRFIGDIMSELVPERKRETVGRRAKHQEAVAR  
RAFVEKVGQKIESDNKHRS DGISLLNKLTRGFIDSFEGAKLINLPGIHVYTVFMKPTDIQEEMLAKVTM  
PKLGSSRFPLEVELLITIGSIHPWLIKTTKAVSTFFSPAEVKKVERYKRDFAAAGCKAKFVIDLLHKSSFR  
GERVLIFCHNVSPITFLVKLIEMVFGWRLGEEVLVLQGDQELPVRSDVMDKFNNGDSAGKRKVLIASTT  
ACAEGISLTGASRLVMLDSEWNHSTRQAIARAFRRGQERTVYVYLLVASGTWEEEEKYNSNRKAW  
MSKMVFLGRYVDDSSQNRVTDIDDEVKELADEDHTGTFHMIVKQD

>LOC\_Os03g06920/Os03g0165266/CHR730

MARYPAPTSSRAIGAPIQPTPHAPLPNTGGEGAPPPARTMPPSSQAATSTPPAAATPLQRPPAQA  
TAQPSTQRYVGVQRDKGTGKWAACVVDPSNPTKHRLVGAFPDEHAAALAHDRDLA FRGGGHRG  
AGDNFRPAFHAVELEFLRLCAATSSPGSHCGLVAGGDYDEKYSEFLRKIYHGVMNPSYKFFDV  
ILDFFIARAREIGREALEDDGMDLVERFVAMHKNKAVTPRWRAWYRSDSRKVLQIPLSLRGGGGEID  
HSTQKEARMDS DSCRRKHESGHDSSSRVQSQSSILSRNRLCHQLLEQCDDLKYGSSTNDYKAISM  
KRLELISILQKLQEVPIQLPYASPLKSSETNRLVQDGRNSSCRNIIDLSDNDEYTFANVDNIGANTTV  
VLVSDDDGDSVASFVDEKSSDSKQANYIEESVLPEQHAQQQEISMLDNENISSEAVKKGKDSMD  
INDVIYNKSGHEEIGEEEAQAENVQIKGNLKEIISVASDELACEVMRSQSPTNGNFDQYDNSSPDEL  
EGLWMDMYLAMACSKTVGSDHNIVPSENCEQAEDQCQHDFLMKDDL GIVCRVCGLIQQRIENIFEY  
QWKKRKQSYRARPSEHRNSSDADAIDKTS GAILEVVPDALCLHPQHSQHMKPHQVEGFNVLKLA  
DENNPGGCILAHAPGSGKTFLIISFVHSFLAKYPAGRPLIILPKGILSTWRTEFLHWQVDDIPLYDFYSS  
KADKRSEQLKVLNLWEESRISLLGYQQFACIVSDHTSDTEAIMCQEKLLKVP SLVILDEGHTPRNEET  
DLLTSLENIRTPRKVVLSTGLFQNHVREVFNILKLVRSKFLKMDKSRAIVNCILSKVDLMGKSARSKNIS  
DKDFFDLVQEHLQKDGNDKMRAVIIQNLREL TADVLHYYQGKLLDELPGIVDFTVFLNMSSKQEHIIK  
LDGINKFAKRSRCNAVSLHPCLKNANKADADDGNVTNRKIGSII SGIDINDGVKAKFVHNL LSLSEATG  
GKVLVFSQYVRS LIFLEKLVSRMKGWKSEVHIFRVTGGSTQDQREQAVHRFNNSPDARVFFGSIKAC  
GEGISLVGASRIVLDVHENPSVMRQAIGRAYRPGQSKMVYCYRLVAADSPPEEDDHHTAFKKERVSK  
LWFEWNELCSSDDFELATVDVSDSEDRFLESSALKQDIKALLKR

>LOC\_Os08g14610/Os08g0243833/CHR743

MSGSGNSLDTVALIVGGGSDSSGIVGRKRRRCDLIRERWCC LCPVWCKEAEVVPGRGRNGARQ  
RDGGGCALGTTEVLGRICNSSVEKAEERETVIPAINTEKMGEKQKQK SIPRDRKRKGELDPAADYVK  
DLWDAFYVTAESTHLDTSEVNKKQLDNCNHDHIVYEDLGHVCHECGLVVRKADSLFH YQWKKASR  
KRTNVNEVCLKKVGSDAISLSEDFIFSDIAIHPRAKNIRPHQLEGFKFLVNNLVTDEPGGCILVHAPGS  
GEIFMLISFIQGF MARHFTARPLVVLPEGILGTWKREFQQWQVEDIPLYDFDSIKADNRVEQLEVLKS  
WSSKRSILFVSGKHFTQIVCDDRDENAVAECRDTLLMPSLLILDEGHTPSIDETDMLQSARKVQTPC  
KVVMSGTLFHNHVKEVFNTLDLVRPGFLKTETFWPIVTRMMGQLEISSARSITEISESMEDTLLNDDNF

TRKVN VIRSLGELTKDVLHYCKGEDLNEFPVLLDFSVFLELSPKQKDILCKLEEDHGMLKTSAVGAALY  
VHPCLSEISEANDVDRDDRVDLNSINLGDGVKARFFLNILALANSAGEKLVAFSQYTLPMKFLERLL  
VKEMGWHVHGKEIFVINGDTSMEDGQLAMDQFNGSADAKVLFSGIKAFGEGISLVGASRVIDVHLNP  
SVTRQAIGSTFRPGQKKVVFYRLVAADSPEEKAHETAFAFNEKVIKLVFQWWSGRCTTEDFKLNQVCI  
DGSRDELLETDIRQDIKALYQSIDMGLVSEATVCFNNVSSSGLSVHDTGGNVIGQGDQDSEKNRYL  
SIASETMLVHFVHVSFVVCVPVNTTCSLSICREILWFLIGTREVPFSSVKFGISSWMGKITLIRIFRILYDE  
KGQIALLASKGSIKDKQEACKSWRYPsiHPWLTEAVVLAFTAATPPHLLAVAGPLPLPSLCSAVPFALL  
YYFGKGRKVVHTLKNWLQQVSVENKICGWGYNTTEVLGRICNCSVEKAEERETIILASGNMEKMEEK  
HQKSDQDFHFSSTMAIPRERKQKGEVDPADCLKDRWGAFYVAVESTQLDSEVNKKQLNNYN  
HDIHVYEDLGRVCHCEGSGEIFMLISFIQGMTRHSTARPLGTWKREFQQWQVEHCSGFIYL

>LOC\_Os08g19250/Os08g0289400/ SNF2-related domain containing protein

MAGFADALRPDKFTSVHFKRWQIRVNLWLTAMKCFWVSTGKPMGVNLADQQKEFDEATTLFVGCIL  
SVLGDRLVEVYMHMTDATELWDALNTKFGATDASNDLYIMEQFHVYKADNRVSVVEQAHKIQTMAK  
ELKLLKCVLPDKFVAGCIIAKLSPSWRGFGTALKHKRQEYFVEGLIASLDVEEKAREKDVASKGDGGQ  
SSTNVVHKAQNKSKGKYKAQQTTFNKKKNNPNQDERTCFVCGQPGHLARKCPQRKGMKAPA  
GQTSKSANVTIGNTGDGSGYGRTGFHRPNGEWVTCFCSWCWHGRSEVYFGKDRAAEERVAYYWK  
EDVRSEMDSIIANGTWEVTERPYGCKPVGCKWVFKKLRPDGTIEKYKARLVAKGYTQKEGEDFFDT  
YSPVARLTTIRVLLSLAASHGLLIHQMDVKTTFLENEELDEEIYMDQPDGFVVEGQEDKVKLLKSLYGL  
KQAPKQWHEKFDKTLTSAGFAVNEADKYVYRHGGGEGVILCLYVDDILIFRTNLEVINEVKSFLSQN  
FDMKDLGVADVILNIKLIRGENGITLLQSHYVEKILNRFYIDSTMELGLHYSGYPAVLEEYSGSNWISD  
VDEIKATSGYVFTLGGGAVSWRSCKQTILMRSIMEAELTALDTATVEAEWLRDLLMDLPIVEKVPVAIL  
MNCNDNQTIIVKMNSSKDNMKSSRHVKRRLKFRVRLRNSGVITLDYIQTARNLANPFTKGLSRNVIDNA  
SKEMGLRPISNDTLMMLYICNVMIIYLNILNHYMPIFSTFKRHEIEAYEKFKRSVGTALYIHPCLSEISE  
GDAADRASNLTATVDSLIESIIKDGVKAKFFFNIMSLANSAGEKLLAFSQQYILPMKFLERLLVKRLGW  
HVGKEIFMISGDTSADDREVAMDQFNNSADAKVLFSGIKACGEGISLVGASRVIDVHLNPSVTRQAI  
GRAFRPGQKKVVFYRLVAADSPEVKFHETAFAKKEVVKLVFEWSELCTTEDFKLNQVDIDDESEDELL  
EANAIRQDIKALYRRMLQ

>LOC\_Os06g14440/ Os06g0255700/CHR737

MYRRQRKASSEANANVFMPPGPNDISFPASNRDHDWGYGGVKGWEASYARKLQLMNFSSSLH  
QRTANPLVTTRMDANMDTPLEQKQKDSSAIIVLDSDDDEGYTEGCEQLTSENKQQAAPSGLTSPYTT  
WIVSSAKDQVNGTLHVDGVQSTQIVPYYGQNAPLINQFPLQTSWQPSIQYERVILQKRPEEQRVQDL  
VAASHAEKIAETQVLLTLPNERNRKRKTEPTTLVDVDGGTNLGRKRKRKNHQNQAAVDSNLDLQQN  
DVPSQSYRTMIEEEKPVKESDGLDLWKDFSLAAECTKLDTNEDMSNEKDVDDENEMDDDCNHDIRI  
HEDLGHVCRICGMIVRKAETIIDYQWKKASRTRTNYYESRSKDADEIDTGAVKVSEDFIVSDIAIHPRH  
AKQMRPHQLEGFSFLVKNLVGDKPGGCILAHAPGSGKTFMLISFIQSFLAKYPSARPLVVLPGILGT  
WKREFQRWQVEDIPLYDFYSVKADKRVEQLEVLKSWEAQMSILFLGYKQFSRIICGDGDGNIAAACR  
DRLLMVPNLLILDEGHTPRNRETDLASLKRVTQPRKVVLSGTLFQNHVSEVFNILDVLRPKFLKMS  
SRPIARRIMSQVAISGIRSLKGVHDSAFTESVEDTLLNDNFTRKAHVIRSLRELTKDVLHYYKGDILDE  
LPGLVDFSVFLKLSTKQKEIVHKIEAYEKFKRSVGTALYIHPCLSEISEGDAADRASNLTATVDSLIE  
SIIKDGVKAKFFFNILSLANSAGEKLLAFSQQYILPMKFLERLLVKRLGWHVGKEIFMISGDTSADDREVA  
MDQFNNSADAKVLFSGIKACGEGISLVGASRVIDVHLNPSVTRQAIGRAFRPGQKKVVFYRLVAA  
DSPEVKFHETAFAKKEVIPKLVFEWSELCTTEDFKLNQVDIDDESEDELLEANAIRQDIKALYRR

>CLSY3(AT1G05490)

MECIGKRVKSRWQRLQAVNKRKKMETVAPVTSPPKRRQKKPKNYDSDIEDITPTCNDVSPPPQV  
SNMYSVPNNSVKEFSRIMRDLNVEKKS GPSSSRLTDGSEQNPCLKERSFRVSDLGVEKKCSPEITD  
LDVGIPVPRFSKLDVSEQNNTCLMQKSSPEIADLDLVISVPSSSVLKDVSEEIRFLKDKCSPEIRGLVL  
EKSVPGEIEILSDSESETEARRRASAKKKLFEESSRIVESISDGEDSSSETDEEEENQDSEDNNTKD  
NVTVESLSSDPSSSSSSSSSSSSSSSSSSSDDES YVKEVVDNRDDDDLRKASSPIKRVSLVERKA  
LVRYKRS GSSLTKPRERDNKIQKLNHREEEKERQREVVRVVTKQPSNVVYTCAHCGKENTGNPES  
HSSFIRPHSIRDEIEDVNNFASTNVSKYEDSVSINSGKTTGAPSRPEVENPETGKELNTPKPSISRPEI  
FTTEKAIDVQVPEEPSRPEIYSSEKAKEVQAPEMPSRPEVFSSEKAKEIQVPEMPPIEQNSEKAKEV  
QANNRMGLTTPAVAEGLNKSVVTNEHIEDSDSSISSGDGYESDPTLKDKEVKINNHSDWRILNGNN

KEVDLFRLLVNSVWEKQQLGEEDEADELVSSAEDQSSEQAREDHRYDDAGLLIIRPPPLIEKFGVEE  
PQSPVVSEIDSEEDRLWEELAFFTKSNDIGGNELFSNVEKNISANETPAAQCKKGGKHDLCIDLEVGL  
KCMHCGFVEREIRSMDVSEWGEKTTRERRKFDREEEEGSSFIGKLGFDAPNNSLNEGCVSSEGTV  
WDKIPGVKSQMPHQEGEFWIWKNLAGTIMLNELKDFENSDETGGCIMSHAPGTGKTRLTIIFLQAY  
LQCFPDCKPVIIAPASLLLWAEFVKWNISIPFHNLSLDFTGKENSAAALGLLMQKNATARSNNEIRM  
VKIYSWIKSKSILGISYNLYEKLAGVKDEDKTKMREVKPKDELDDIREILMGRPGLLVLDEAHTPRN  
QRSCIWKTLSKVETQKRILLSGTPFQNNFLELCNVLGLARPKYLERLTSTLKKSGMTVTKRGKKNLGN  
EINNRGIEELKAVMLPFVHVHKGSIQSSLPGLRECVVVLNPPQLRRVLESIEVTHNRKTKNVFETEH  
KLSLVSVHPSLVSRCKISEKERLSIDEALLAQLKKVRLDPNQSVKTRFLMEFVELCEVIKEKVLVFSQYI  
DPLKLIKHLVSRFKWNPGEVLYMHGKLEQKQRQTLINFPKSKAKVFLASTKACSEGISLVGAS  
RVILLDVVWNPAPERQAISRAYRIGQKRIVYTYHLVAKGTPEGPKYCKQAQKDRISELVFACSSRHDK  
GKEKIAEAVTEDKVLDTMVEHSLGDMFDNLIVQPKEADLVEGFSILMP

>CLSY4(AT3G24340)

MDMTSCVARRTRSRTESYLNSILNKSISGEEEDQSLGCVNSRTEKRRVNMRDACSPSPRKKRR  
RRKDDDDVVVFRTEYPEGKRDDENVGSTSGNLQSKSDFDFGDRVCFDADDRNLGCEEKASNFNPI  
DDDDVVVFGTVQRENDHVEDDDNVGSASVISPRVCFDEDDAKVSGKENPLSPDDDDVVFLGTI  
AGENQHVEDVNAVSEVCDILLDDANLRGEEKTYVSDEVVSLSSSSDDEEDPLEELGTDSREEVSGED  
RDSGESDMDDEDANDSDSSDYVGESSDSSDVESDSDSDFVCSSEDEEGGTRDDATCEKNPSEKVVYHHK  
KSRTFRRKHNFDVINLLAKSMLESKDVFKEDIFSWDKIAEVDSREDPVVRESSESSEKVNHEHGKPRERR  
SFHRVREKNHLNGESFYGGKLCDEETINYSTEDSPPLNLRFGCEEPVLEKTEEEKELDSLWEDM  
NVALTLEGMSSTPDKNGDMLCSKGTHDFVLDDEIGLKCVHCAYVAVEIKDISPAMDKYRPSVNDNK  
KCSDRKGDPLPNRLEFDASDPSSFVAPLDNIEGTWVQYVPGIKDTLYPHQQEGFEFIWKNLAGTTKIN  
ELNSVGKVGSGGCIISHKAGTGKTRLTVVFLQSYLKRFPNSHPMVIAPATLMRTWEDEVKWNVNIPF  
YNMNSLQLSGYEDAEAVSRLEGNRHHNSIRMVKLVSWWWKQKSILGISYPLYEKLAANKNTEGMQVF  
RRMLVELPGLLVLDEGHTPRNQSSLIWKVLTEVRTEKRIFLSGTLFQNNFKELSNVLCLARPADKDTIS  
SRIHELKCSQEGEHGRVNEENRIVDLKAMIAHFVHVHEGTILQESLPGLRDCVVVLNPPFQKKILD  
RIDTSQNTFEFEHKL SAVSVHPSLYLCCNPTKKEDLVIGPATLGTGLKRLRLKYEEGVKTKFLIDFIRISGT  
VKEKVLVYSQYIDTLKLIMEQLIAECDWTEGEQILLMHGKVEQRDRQH MIDNFNPKPDSGSKVLLASTK  
ACSEGISLVGASRVVILDVVWNPVSVESQAISRAFRIGQKRAVFIYHLMVKDTSEWNYCKQSEKHRIS  
ELVFSSTNEKDKPINNEVSKDRILDEMVRHEKLNKHFELKILYHPKKSMDMNTSFF

>CLSY2(AT5G20420)

MKKRGFYNLKHPFDPCPFEEFCSGTWKPV EYMRIEDGMMTIRLLENGYVLEDIRPFQRLRLRSRCAA  
LSDCICFLRPDIDVCLYRIHEDDLEPVVVDARIVSIERKPHSEECSCKINRIYIDQGCIGSEKQRINRD  
SVVIGLNQISILQKFYKEQSTDQFYRWRFSEDCTSLMKTRLSLKGFLPDL SWLTVTSTLKSIVFQIRTV  
QTKMVYQIVTDEEGSSSTLSSMNITLEDGVLSKVVKNPADILDDSQDLEIKQETDYYQEEDEVVEL  
RRSKRRNVRPDIYTGCDEYEDTIDGWVRMMPYQFGKCAVNVESEDEDEDNNEGDGTDNDLYIPLSR  
LFIKKKKTNSREAKPKSRKGEIVVIDKRRVHGFGRKERKSELVIPFTPVFEPIPLEQFGLNANSFGGG  
GSFRRSQYFDETEKYRSKGMKYGKKMTEEMMEADLCWKGNQVKSQKRTSRSSRSVAPKTE  
DSDEPRVYKVTLSAGAYNKLIDTYMNNIESTIAAKDEPTSVVDQWEELKKNFAFKLHGDMEKNLSE  
DGEGETSENEMLWREMECLASSYILDDNEVRVDNEAFEKARSGCEHDYRLEEEIGMCCRLCGHVG  
SEIKDVSAPFAEHKKWTIETKHIEEDDIKLSHKEAQTDFSMISDSSEMLAAEESDNVWALIPKLR  
KLHVHQRRAFEFLWRNVAGSVEPSLMDPTSGNIGGCVISHSPGAGKTFLLIAFLTSYLKLFPGKRPLV  
APKTTLTYWYKEFIKWEIPVPVHLIHGRRTYCTFKQNKTVQFNGVPKPSRDVMHVLDCLEKIQKWA  
HPSVLVMGYTSFTTLMREDSKFAHRKYMALVRESPGLLVLDEGHNPRSTKSRLRKALMKVGTDLRI  
LLSGTLFQNNFCEYFNTLCLARPKFIHEVLMELDQKFKTNHGKVNKAPHLLNRRARKLFLDIIAKKIDASV  
GDERLQGLNMLKNMTNGFIDNYEGSGSGDALPGLQIYTLVMNSTDIQHKILTQLQDVIKTYFGYPL  
EVELQITLAAIHPWLVTSSNCCTKFFNPQELSEIGLKHDAKKGSKVMFVNLIFRVVKREKILIFCHNIA  
PIRMFTELFENIFRWQRGREILTGTGDELEFERGRVIDKFEENGNPSRVLLASITACAEGISLTAASRVI  
MLDSEWNPSKTKQAIARFRPGQKQVYVYQLLSRGTLEEDKYRRTTWKEWVSCMIFSEEFVADPS  
LWQAEKIEDDILREIVGEDKVKSFHMIMKNEKASTG

>CLSY1(AT3G42670)



MKRKHYYEFNHPFNPCPFVFCWGTWKAVEYLRIENGTMTMRLLENGQVLDIIPFQRLRIRSRKAT  
LIDCTSFLRPGIDVCLVYQRDEETPEPVVVDARVLSIERKPHSECLCTFHVSVIDQGCIGLEKHRM  
NKVPVLVGLNEIAILQKFCKEQSLDRYYRWYSEDSSLVKTRNLGKFLPDLTWLLVTSVLKNIVFQI  
RTVHEKMVYQIVTDEDCEGSSSSLSAMNITVEDGVVMSKVFLNPAEDTCQSDVKEEIEEEMELR  
RSKRRSGRPERYGDSEIQPDSKDGWVRMMPYRYNIWVNSDDDDDEEEDCEDDKDTDDDLYLPLSH  
LLRKKGSKKGFSDKQREIVLVDKTERKKRKKTEGFSRSCELSVIPFTPVFEPIPLEQFGLNANSLCGG  
VSGNLMDEIDKYRSKAAKYGKKKKKKIEMEEMESDLGWNGPIGNVVKRNGPHSRIRSVSRETGVS  
EEPQIYKRTLSAGAYNKLIDSYMSRIDSTIAAKDKATNVVEQWQGLKNPASFSIEAEERLSEEEEDDG  
ETSENEILWREMELCLASSYILDDHEVRVDNEAFHKATCDCEHDYELNEEIGMCCRLCGHVGTIKHV  
SAPFARHKKWTTETKQINEDDINTTIVNQDGVESHFTTIPVASSDMPSAEESDNVWVSLIPQLKRKLHLH  
QKKAFFELWKNLAGSVVPAMMDPSSDKIGGCVVSHTPGAGKTFLLIAFLASYLKIFPGKRPLVLAPKTT  
LYTWYKEFIKWEIPVPVHLLHGRRTYCMSKEKTIQFEGIPKPSQDVMHVLDCLDKIQKWAQPSVLM  
GYTSFLTLMREDSKFAHRKYMAKVLRESPGLLVLDEGHNPRSTKSRLRKALMKVDTDLRILLSGTLFQ  
NNFCEYFNTLCLARPKFVHEVLVELDKKFQTNQAEQKAPHLLNRARKFFLDIIAKKIDTKVGDRLQG  
LNMLRNMTSGFIDNYEGSGSGSDVLPGLQIYTLLMNSTDVQHKSLTKLQNMSTYHGYPLELELLITL  
AAIHPWLKTTTTCCAKFFNPQELLEIEKLDKDAKKGSKVMFVNLVFRVVKREKILIFCHNIAPIRLFL  
FENVFRWKRGRELLTLTGDELFERGRVIDKFEPPGGQSRVLLASITACAEGISLTAASRVIMLDSEW  
NPSKTKQAIARAFRPGQKVVVYVYQLLSRGTLEEDKYRRTTWKEWVSSMIFSEEFVEDPSQWQAEKI  
EDDLREIVEEDKVKSFHMIMKNEKASTGG

>DRD1(AT2G16390)

MGFVYIVMTGYYKNVHKRQKQVDDGPEAKRVKSSAKVIDYSNPFVAVSNMLEALDSGKFGSVSKEL  
EEIADMMDLVKRSIWLPSLAYTVFEAEKTMNDQVVEGVINLDDDDDDDDTDVEKKALCVVPSSEI  
VLLDSDDEDNERQRPMYQFQSTLVQHQNQGDVTPVIPQCSFEEVDLGRGKEMPSAIKAIVEGQTSR  
GKVLPIENGVVNEKGVYVGVVEEDSDNESEAAEDLGNIWNEMALSIECSKDVARETSHKEKADVVE  
DCEHSFILKDDMGYVCRVCGVIEKSILEIIDVQFTKAKRNRTRYASETRTKRFGESDNELKFSEGLMI  
GGLAHPHTAAEMKPHQIEGFQFLCSNLVADDPGGCIMAHAHAPGSGKTFMIISFMQSFLAKYPQAKPL  
VVLPKILPTWKKEFVRWQVEDIPLDFYSAKAENRAQQLSILKQWMEKKSILFLGYQQFSTIVCDDTT  
DSLSCQEILLKVPKILDEGHTPRNEDTNLLQSLAQVQTPRKVVLSGTYQNHVKEVFNILNLVRPKFL  
KLDTSKSAVKRILAYTPCDVRGRLTGSNSDMASMFNETVEHTLQKSEDFTVKIKVIQDLREMTKKVLH  
YYKGDFLDELPLADFTVVLNLSPKQLNEVKKLRREKRKFKVSAVGSAILHLPKLVFSDKSDDVSDT  
TMDEMVEKLDLNEGKAKFFLNINLCSAGEKLLVFSQYLIPLKFLERLAALAKGWKLGKEVFLTGN  
TSSEQREWSMETFNSSPDAKIFFGSIKACGEGISLVGASRILLDVPLNPSVTRQAIGRAFRPGQKVM  
HAYRLIAGSSPEEEDHNTCFKKEVISKMWFWEWNEYCGYQNFVETIDVDEAGDTFLESPALREDIRVL  
YKR

>GRMZM2G178435(RML1/CHR167/ZmCLSY3)

MPAPPSTEAGRSRTMTRVILLDSKEDDGTGRQAGRELGGAAIASAGEASKLVKPEVDDVGSNPV  
RPGALPTSLRVQGHRAVSSPSPVPAVRKQPEIIAISDEDNDGSRFRVRRVKDEASDWVLSAKAKR  
AMVSGVPPGSSDVKRRKRKRGSSGAGDFHALDRNLSASGAGRRTSWMAEDAGSSRNVSSELSRG  
GVGDRSGSTKARGAPGKTRRGGRTRRERSTSAAPANLVGGSATVGSRIRLRSRQQGRVQCATYS  
ARVSSDTEGEDEKHMQEQRVEDVEFMEVDDDDYDDVNVAGNVIDQESEQDEALEGRSSQDSHGYS  
EDKEGKDSAALSNEEDVGGKELLEEEEEEGADQEEESHIIYDGEGEQEEDASEEETQELDETGEAQPF  
NPSNTMAGSTMRSGGDGKQVFRRRVFEGIYLPENPHRTVGKGIQGRTRSQRKCKDKKLLKRGTFK  
PYNIDIPDSTSDSEEEIEPPAPQQGLSSSEEDNMTFGKRKRRAAINKRWDKRLSASSDEEDYGAS  
AMDAKERPFRRLLKGLSNLQAAKEGCRNYEGSNPGHARYSGPNGGNLENMSSAQDDISFKRNVHM  
IRIKKRGRAAKAVYDELDSLFSGWENHIGNPVHAEAGNSLPLVFSFGDEDAEENTENDKYQEEDL  
WMECGIAFQSMNIGSNGCEEDGKEIPPVKVTSNIGQHEFIIDEQIGVRCKHCHVVDLEIRDVLPGLGK  
CSAERGSAINPEFDRMLKEMLNVEQNDVLSNGHELPCNFGDHDKAGSVWNLIPGVKTMFPHQQD  
AFEFMWTKLAGGTTIEQLKHTIKSDAGGGCVISHAPGTGKTRLAITFVQSYLEVFPHCSPVIIAPRGM  
ATWEKEFRKWKATGEARVLDERKLANHEGMDGDKVRKLLLEKPNLLVLDEGHTPRNKKSLIWKVLK  
RVHTEKRIILSGTLFQNNFEELYNTLRLVRPKDADALHLETDESKDFWSSLRLNDITKANINEVRKLD  
PIVHIHSGRFLQKSLPGLRESVVILNPLLYQKEVIASMEKTVAMGLDAEYKISLASIHPSSLASAKLSMKE  
ESILDKPKLESLSRNSPSSGKTRFVLEIVRLCEALNERVLVFSQYLEPLSLIMEQLKERFSWAEGEEILL  
MSGKVLVKKRQTMMEVFNNMKS KAKVMLASTKACCEGITLVGASRVLLDVVWNPVSVGRQAIGRAY

RIGQRKIVYTYNLIAEGTTEKRKYDRQAKKEHMSKLLFSNELERGGCNLPPELTFNDRVLEELTARED  
LKNLFV

>GRMZM2G154946(RMR1/ZmCLSY4)

MDRATPRVCGRRGVSQAAVEAAPSSSRARRRDKAPAVVMDLGDDDCGGGGARKTVGGAAGRCE  
GSTKAPLPLPPMMVPAGAVLRTRSRRRAMLAAAVVEEAPTCKKKKKEGAIPDAAEAPRGHGSKAAA  
TSMATSSHKRRAGTSRSTSRDKRRARSGRASEPARVGRARKRKRNELEAPARRERVKAPCVSESD  
DNSGRGDDASHDGAEPVGVVAIGTDLVNGDHPAAKEVVEGAGDEDTDGDDGNSGLASTADVFAEE  
MAPFEDDYDDEMLEEQLVGDVIRAYSNRNFSDSGVDWEAEDEMEFNDDADNSDFMDDADDSDF  
MDDAYEGGNSKPIQNHAKLEIQDWVNQKVVLSSGGRCEARGEGLDLEELDVGKEADEEDVEPKSEAA  
PGSDKRVLQLEILGSDEEIKVLENMSSAPSRKASVQSKLPTIPSCVAWRTRSSWGVNQDRLSYDITYF  
EELSDEPKEDDDDEVELDEVEDDNDSSDAYDKDDEEKEEEEEEAERRKLNNRICTSDEDMINI  
TVPTSRYDMFKKNSRYDIEWVEDEDAVDMLQPVSFKKDSSWKPVAVGNDFTEQQKRSRFTW  
ELERRKLLKLEMKTNPLHERDLSDPNSSGSDQIRKYGFKSDGSHKVDKRRKHTSPKSGKKPSSAIL  
KRQSLKLLVDMKMSGDKSLASFDFDQNPQLQFIFKEMHPLVFSFGDEDLVAADRPEQDVGLDMLWA  
DFDFALESENIGTYDDECEQEGNQLDFSLAPVTPCSRKGHEFVIDDQIGIRCKYCSLVNLEIKFMFPSL  
VSVFAEKSAWPNDKGVKNTLMFHDLYEQGVNDTEQSQDIHQYGTVWNLPVISTMYEHQREAFEF  
MWTNLVGDIRLDEIKHGAKPDVVGCCVICHAPGTGKTRLAIVFIQTYMKVFPDCRPVIIAPRGMLFAW  
DEEFKKNVNDVPFHILNTTDYTGKEDREICKLIKKEHRTEKLRVLLSWNKGHGILGISYGLYTKLTS  
EKPGCTEENKVRISILLDNPGLLVLDEGHTPRNERSVMWKTGLNVKTEKRIILSGTPFQNNFLELYNILC  
LVRPRFGEMFLTKSRVGRRHVYVSKKQKDKFSDKYEKGVWASLTSNVTDDNAEKVRSILKPFVHIHNG  
NILRTLPLGLRESVIILKPLPLQKSIKKVENIGSGNNFEHEYVISLASTHPSLVTAIINMSEEEASLIDKPM  
AKVRSNPYEGVKTRFVIEVRLSEALREKVLIFSQFIQPLELIKEHLRKFVKWREGKEILQMDGKILPRY  
RQASIEAFNNPNDSRVLLASTRACCEGISLTGASRIVLLDVVWNPVAVGRQAISRAFRIGQKKFVYTY  
NLITYGTGEGDKYDRQAEKDHLKLVFSTEDFNVRNMLSKAEMEHCSKFISEDKVLEEMTSHDQL  
KGMFLKIHYPPTESNIVYSYNQIATE

>GRMZM2G108166 (CHR166/RMRL2)

MVKGSTGHHSNPIAPVLQHDIDGSYLRVRSRKATCSDCSHVLKPGADVVCVWQAVYRGETKDSVLLC  
CRDARLIKIRNHQSDRCLCLFAVIFYKDQCPGSKEKVISGTIADVVTIDDICILQNLQPEELQDGSVRW  
NSAVDCFHHRNSKLLSARFSLEVAYLIVLSSLRRMEFNKIMVDGNIIYQIIKGDQARDSIDSMSIPPGFG  
KNMDIISFKPRGEALRPITRTVPVTQVEEGLNTEGCIAVKGESDSAQDVEILYAHVDIRRSKRMKTQP  
DRFTSYDARNFNRTYNKKEADGPSTKYEDSEGLSCDSSEQRESSDEEALENPRSMAAEHKYPVKR  
NQCSLPVKEKQISMEIKNTTDQGCSDSYIPHTPAKNTERRFRFKPFASSRSLDGNSEPAFCQKRG  
RKRKHKMCQIEYKRMIDQCIGNIQCEVERDSDFKFGDQILDGCVRAYQEVDFTPSSADSQEEKDEL  
DELWKEMDYALATVAILEQKQMTDSEVVHESNTDLGKGGEHCHHDCMLDEQLGLTCRLCNVVCIEA  
KDIFPPMFTGKDHHERPERNHFGQDGHVLDLSFFEICAPEFSKIKESGNVWASITDLEPKLLAHQRKAF  
EFIWKNLAGSLQLEEMDGSTSRGGCVVAHTPGAGKTLISFLVSYLKVHPRSRPLVTPKAAIHTWR  
TEFQKWGILLPLHVLHHSNRTSKLMGGLSSKLQAVLKSFHQPSWKTMRIMHCLDKLCKWHEEPSILL  
MTYSSFLSLTKEDSKLRHQAFITKVLMMNPGLLILDEGHNPRSNKSKLRKLLMKVKTEFRILLSGTVFQ  
NNFEEYFNLSLARPRFVNDVMTTLVTESEKRTRSRTGKHQEARHVFVERVGHKIESSSKHDRMD  
GISLLNELTQGFIDSFEGTKLNILPGIRVYTLFMKPTDVQEEVLAKLLMPLSGNARYPLEYELLITIASIHP  
WLINTTKCASTYFTPAEVASVDKYKRNFAAGCKAKFVIDLLHKSSFRGERVLVFNHVAPIAFLVTLIEI  
VFGWRLGQEVLLVQGDQELHVRSDVMDKFNDRRGKRKVLIASTTACAEGISLTGASRLVMLDSEW  
NHSKTRQAIARAFRPGQERMVYVLLVASGTWEEDKYNSNRRKAWIAKMVFFGRHFDDPLQNRVTE  
IDDEVLKELADEDETNTFHMIVKQD

>GRMZM2G393742(RML3)

MSQSPGGREGIYYSRQRKPSERNGSVFTPIAAMYPSGHALPDANRNHSLVFGGTSKDWDNIRQFIA  
SLERASENSSAIASKTGGGKSTNHSVEPAEQKGGDIIVLSDDEDGDGNSPEHNKLASEMKNELGT  
SVLASNIAERMATNGSQTFETVHAYGGSKNTQIVPYGQGSALVNQFPLQTSWQPSIQFERVVLTKRP  
EEQRMQDLVAATIAEKRAETQMFLSLPTERRRRTDHSLMLDSFVPKQRRRKGDTGLAPADLSLDL  
HQTATSQEPDIAIEEEEKRNKNDGDGLEDYWKDFALAVESTKLDDVDAAANEKEDNGKMEDIDCNHD  
IRIHEDLGHVCRVCGMIVRRADSIIDYQWKKASRRRMNGYGGNSKDADEIDCGTVKLSDFIVADIAIH  
PRHAQAMKPHQVEGFNVLVKNLIGDKPGGCILAHAPGSGKTFLLISFIQSFMARYPSARPLVVLPGKIL

VIWKKEIQRWQVQDIPVYDFYSVKAERVEQLQILKSWEDKMGILFLGYKQFSTIVTDDGGSKVTAAC  
RDRLLKVPNLLILDEGHTPRNKETDVLESLSRVETPRKVVLSGTLFQNHVEEVFNILNLVLPKFLRMES  
SRPIARRIMSQVEIFGRSSKGLADGAFTEAVEGTLLNDENFKRKVHVIRGLRELTRDVLHYYKGAILDE  
LPGLVDFSVFLKLTpkqkDIVHKLEMHDRFKRSAVGSALYIHPCLSGLSEVNAENRAHTLRDDSVDSL  
MDSINVRDGVKANFFMNILSLANSAGEKVLAFSQYILPMTFFERLLVKKKGWHVGREIFMISGDTSQE  
DREAAVDRFNSSADAKVLFGSIRACGEGISIVGASRVVILDVHLNPSVTRQAIGRAFRPGQKQKVFVY  
RLVAADSDEVKHETAFKKEVIQKLWFEWSEQCTTENFKLGQVDIDDSGDELLDTRAIRQDIKALYRR

>AtSHH1 (AT1G15215)

MAASDDSSHYTEFTLSEIVDMENLYKELGDQSLHKDFCQTVASTFSCSVNRNGKSSITWKQVQIWF  
QEKLKHQSQPKSKTLPSPPLQIHDLNPNSSYASNASNATFVGNSTFVQTRKKGASDLADLAFEAKSA  
RDYAWYDVSSFLTYRVLRTGELEVRVRFSGFDNRHDEWVNVKTSVRERSIPVEPSECGRVNVGDLL  
LCFQEREDQALYCDGHVLNKRGIHDHARCNCVFLVRYELDNTTEVRRLLISAFLLGVGTIDEVLC

Supplementary Table 3: Details of high-throughput genomics data obtained from publicly available datasets

| Sl.No | Dataset type | Genotype            | Source tissue                         | SRA number  | GSE number | Reference |
|-------|--------------|---------------------|---------------------------------------|-------------|------------|-----------|
| 1     | RNAseq       | WT (PB1)            | pre-emerged panicle                   | SRX11493038 | GSE180457  | 1         |
| 2     | RNAseq       | WT (PB1)            | pre-emerged panicle                   | SRX11493039 | GSE180457  | 1         |
| 3     | RNAseq       | osnrpd1-kd          | pre-emerged panicle                   | SRX11493040 | GSE180457  | 1         |
| 4     | RNAseq       | osnrpd1-kd          | pre-emerged panicle                   | SRX11493041 | GSE180457  | 1         |
| 5     | RNAseq       | WT (PB1)            | Anther                                | SRX11493042 | GSE180457  | 1         |
| 6     | RNAseq       | WT (PB1)            | Anther                                | SRX11493043 | GSE180457  | 1         |
| 7     | RNAseq       | osnrpd1-kd          | Anther                                | SRX11493044 | GSE180457  | 1         |
| 8     | RNAseq       | osnrpd1-kd          | Anther                                | SRX11493037 | GSE180457  | 1         |
| 9     | RNAseq       | WT_T1_r1            | Leaf                                  | SRX6976682  | GSE138705  | 2         |
| 10    | RNAseq       | WT_T1_r2            | Leaf                                  | SRX6976683  | GSE138705  | 2         |
| 11    | RNAseq       | osdrm2_T1_r1        | Leaf                                  | SRX6976688  | GSE138705  | 2         |
| 12    | RNAseq       | osdrm2_T1_r2        | Leaf                                  | SRX6976689  | GSE138705  | 2         |
| 13    | RNAseq       | Nip_se_rep1         | Seedling                              | SRX5724238  | GSE130168  | 3         |
| 14    | RNAseq       | Nip_se_rep2         | Seedling                              | SRX5724239  | GSE130168  | 3         |
| 15    | RNAseq       | osrd2-6_se_rep1     | Seedling                              | SRX5724240  | GSE130168  | 3         |
| 16    | RNAseq       | osrd2-6_se_rep2     | Seedling                              | SRX5724241  | GSE130168  | 3         |
| 17    | RNAseq       | osrd2-6_se_rep3     | Seedling                              | SRX5724242  | GSE130168  | 3         |
| 18    | RNAseq       | WT_base_rep1        | Shoot base of seedling                | SRX5846194  | GSE131319  | 4         |
| 19    | RNAseq       | WT_base_rep2        | Shoot base of seedling                | SRX5846195  | GSE131319  | 4         |
| 20    | RNAseq       | WT_base_rep3        | Shoot base of seedling                | SRX5846196  | GSE131319  | 4         |
| 21    | RNAseq       | osnrpd1ab_base_rep1 | Shoot base of seedling                | SRX5846203  | GSE131319  | 4         |
| 22    | RNAseq       | osnrpd1ab_base_rep2 | Shoot base of seedling                | SRX5846204  | GSE131319  | 4         |
| 23    | RNAseq       | osnrpd1ab_base_rep3 | Shoot base of seedling                | SRX5846205  | GSE131319  | 4         |
| 24    | sRNA-seq     | WT (PB1)            | Endosperm (16-20 days after anthesis) | SRX11504321 | GSE180457  | 1         |
| 25    | sRNA-seq     | WT (PB1)            | Endosperm (16-20 days after anthesis) | SRX11504322 | GSE180457  | 1         |
| 26    | sRNA-seq     | osnrpd1-kd          | Endosperm (16-20 days after anthesis) | SRX11504323 | GSE180457  | 1         |
| 27    | sRNA-seq     | osnrpd1-kd          | Endosperm (16-20 days after anthesis) | SRX11504324 | GSE180457  | 1         |
| 28    | sRNA-seq     | WT (PB1)            | pre-emerged panicle                   | SRX11504325 | GSE180457  | 1         |
| 29    | sRNA-seq     | WT (PB1)            | pre-emerged panicle                   | SRX11504326 | GSE180457  | 1         |

|    |               |                              |                     |             |             |   |
|----|---------------|------------------------------|---------------------|-------------|-------------|---|
| 30 | sRNA-seq      | osnrpd1-kd                   | pre-emerged panicle | SRX11504327 | GSE180457   | 1 |
| 31 | sRNA-seq      | osnrpd1-kd                   | pre-emerged panicle | SRX11504328 | GSE180457   | 1 |
| 32 | sRNA-seq      | WT (Nipponbare)              | Seedlings           | SRX5724235  | GSE130168   | 3 |
| 33 | sRNA-seq      | WT (Nipponbare)              | Seedlings           | SRX5724236  | GSE130168   | 3 |
| 34 | sRNA-seq      | rd2-6                        | Seedlings           | SRX5724237  | GSE130168   | 3 |
| 35 | sRNA-seq      | WT (Nipponbare)              | Panicle             | SRX5724233  | GSE130168   | 3 |
| 36 | sRNA-seq      | osrd2-6                      | Panicle             | SRX5724234  | GSE130168   | 3 |
| 37 | sRNA-seq      | osnrpd1                      | Seedlings           | SRX9211921  | GSE158709   | 5 |
| 38 | sRNA-seq      | osnrpe1                      | Seedlings           | SRX9211922  | GSE158709   | 5 |
| 39 | sRNA-seq      | osnrpe1                      | Seedlings           | SRX9211920  | GSE158709   | 5 |
| 40 | sRNA-seq      | WT rep1 (Hwayoung)           | Leaf                | SRX11930857 | PRJNA758109 | 6 |
| 41 | sRNA-seq      | WT rep2 (Hwayoung)           | Leaf                | SRX11930858 | PRJNA758109 | 6 |
| 42 | sRNA-seq      | WT rep3 (Hwayoung)           | Leaf                | SRX11930859 | PRJNA758109 | 6 |
| 43 | sRNA-seq      | nrp(d/e)2 Rep1               | Leaf                | SRX11930854 | PRJNA758109 | 6 |
| 44 | sRNA-seq      | nrp(d/e)2 Rep1               | Leaf                | SRX11930855 | PRJNA758109 | 6 |
| 45 | sRNA-seq      | nrp(d/e)2 Rep1               | Leaf                | SRX11930856 | PRJNA758109 | 6 |
| 46 | Bisulfite-Seq | WT (IR64)                    | Endosperm           | SRR8937051  | GSE130122   | 7 |
| 47 | Bisulfite-Seq | WT (IR64)                    | Embryo              | SRR8937043  | GSE130122   | 7 |
| 48 | Bisulfite-Seq | WT (Nipponbare)              | 70-days leaf        | SRX6976659  | GSE138705   | 2 |
| 49 | Bisulfite-Seq | oscmt2/cmt3a                 | 70-days leaf        | SRX6976664  | GSE138705   | 2 |
| 50 | Bisulfite-Seq | osdrm2                       | 70-days leaf        | SRX6976666  | GSE138705   | 2 |
| 51 | Bisulfite-Seq | osdrm2                       | 70-days leaf        | SRX6976667  | GSE138705   | 2 |
| 52 | Bisulfite-Seq | osdrm1a/drm1b                | 70-days leaf        | SRX6976671  | GSE138705   | 2 |
| 53 | Bisulfite-Seq | osdrm2/drm3                  | 70-days leaf        | SRX6976672  | GSE138705   | 2 |
| 54 | Bisulfite-Seq | oscmt2/cmt3a/cmt3b/drm2/drm3 | 70-days leaf        | SRX6976677  | GSE138705   | 2 |
| 55 | Bisulfite-Seq | oscmt2/cmt3a/cmt3b/drm2/drm3 | 70-days leaf        | SRX6976678  | GSE138705   | 2 |
| 56 | Bisulfite-Seq | BS-seq_Nip_se_rep1           | Seedlings           | SRX5724238  | GSE130168   | 3 |
| 57 | Bisulfite-Seq | BS-seq_Nip_se_rep2           | Seedlings           | SRX5724239  | GSE130168   | 3 |
| 58 | Bisulfite-Seq | BS-seq_osrd2-6_se            | Seedlings           | SRX5724232  | GSE130168   | 3 |

|    |                |                    |          |           |          |   |
|----|----------------|--------------------|----------|-----------|----------|---|
| 59 | OsAGO1<br>a-IP | WT<br>(Nipponbare) | Seedling | SRX014804 | GSE18251 | 8 |
| 60 | OsAGO1<br>b-IP | WT<br>(Nipponbare) | Seedling | SRX014805 | GSE18251 | 8 |
| 61 | OsAGO1<br>c-IP | WT<br>(Nipponbare) | Seedling | SRX014806 | GSE18251 | 8 |
| 62 | OsAGO4<br>a-IP | WT<br>(Nipponbare) | Seedling | SRX017394 | GSE20748 | 8 |
| 63 | OsAGO4<br>b-IP | WT<br>(Nipponbare) | Seedling | SRX017395 | GSE20748 | 8 |

Supplementary Table 4: List of oligos and probes used in this study

| Oligo Name          | Oligo ID | Oligo sequence (5'-3')                                              | Purpose                                       | Reference  |
|---------------------|----------|---------------------------------------------------------------------|-----------------------------------------------|------------|
| AP_OsCLSY3_F3       | 2571     | CCATCTCCAACGCGGAGCAGAGTAGAACACC                                     | Amplification of OsCLSY3 from genome          | This study |
| AP_OsCLSY3_R1       | 2472     | CTGTAGTGAGAATGGAGAATCTTCAC                                          | Amplification of OsCLSY3 from genome          | This study |
| AP_CLSY3_EX3_RT_F2  | 3709     | GGTGTGAGCTATACGCTTTTCAGG                                            | RT-qPCR and RTPCR of OsCLSY3                  | This study |
| AP_CLSY3_EX3_RT_R2  | 3710     | GCGAAGTGTCTTGCAAACCTTTGGTC                                          | RT-qPCR and RTPCR of OsCLSY3                  | This study |
| AP_CLSY3_Prom_F3    | 2817     | GGCCAGCTAGTACTTTTCAGAGGATCTTCATCG                                   | Amplification from genome of OsCLSY3 promoter | This study |
| AP_CLSY3_prom_R2    | 2818     | GTCGATGATCTCTAGCGAGGGGCTACGTGCAC                                    | Amplification from genome of OsCLSY3 promoter | This study |
| pRGE32_Seq_F        | 1435     | CCGGCTCGTATGTTGTGTGG                                                | Amplification of OsCLSY3 gRNA                 | This study |
| AP_OsCLSY3_gRNA2_R  | 2602     | TATAGGTCTCAAAACAGGAGAGCCGGGAG<br>GTTGTCTGCCACGGATCATCTGCACA<br>ACTC | Amplification of OsCLSY3 gRNA                 | This study |
| Hyg_F               | 415      | AAAGCCTGAACTCACCGC                                                  | RT-PCR and Southern probe                     | This study |
| Hyg_R               | 416      | GGTTTCCACTATCGGCGA                                                  | RT-PCR and Southern probe                     | This study |
| STN_OsRAC1_F        | 2563     | GCTATGTACGTGCCATCCAGG                                               | RT-qPCR                                       | This study |
| STN_OsRAC1_R        | 2564     | TGAGATCACGCCAGCAAGG                                                 | RT-qPCR                                       | This study |
| STN_OsGAPDH_qPCR_F  | 3873     | GGGTATTCTGGGTTACGTTGAGGAG                                           | RT-qPCR                                       | This study |
| STN_OsGAPDH_qPCR_R  | 3874     | ACGGATCAGGTCAACAACGCGAGAG                                           | RT-qPCR                                       | This study |
| AP_CLSY4_RT_F       | 3419     | GTGGTGGATCCAGTGAATGAAGAGTTGG                                        | RT-qPCR                                       | This study |
| AP_CLSY4_RT_R       | 3420     | CCCAAAATTATCACCGTCGCATCAGC                                          | RT-qPCR                                       | This study |
| AP_FIE1_qpcr_F      | 3602     | AAAAAGATGTGGCACCGAAT                                                | RT-qPCR                                       | 9          |
| AP_FIE1_qpcr_R      | 3603     | GGTTCACCTCACCAGCAGT                                                 | RT-qPCR                                       | 9          |
| qPCR_NRPD1a&b_F     | 1769     | TTGCAAGTATTGCTCAAAGGATGG                                            | RT-qPCR                                       | 1          |
| qPCR_NRPD1a&b_R     | 1770     | CCACCAGCAACTTCTGCGATAATTG                                           | RT-qPCR                                       | 1          |
| VHS_GUS_qRT_PCR_Fwd | 1863     | CCCTTACGCTGAAGAGATGC                                                | RT-qPCR                                       | This study |

|                        |           |                                                             |                  |              |
|------------------------|-----------|-------------------------------------------------------------|------------------|--------------|
| VHS_GUS_qRT_PCR_rev    | 1864      | TTCGTTGGCAATACTCCACA                                        | RT-qPCR          | This study   |
| AP_CHOP_PCR_1A_F       | 4820      | CATCCACTGTCCAGATGAAGTCAG                                    | RT-CHOP_PCR      | This study   |
| AP_CHOP_PCR_1A_R       | 4821      | ACTTCGATAATGGTAAAACGCCTCC                                   | RT-CHOP_PCR      | This study   |
| AP_CHOP_PCR_3B_F       | 4826      | AACCATTTCCATCCCATCCCAACTCG                                  | RT-CHOP_PCR      | This study   |
| AP_CHOP_PCR_3B_R       | 4827      | CTAGCGATTCTACTATATTTTAAAGACACATATTC                         | RT-CHOP_PCR      | This study   |
| AP_CHOP_PCR_6A_F       | 4836      | CCTCCGACATGTA CTGCGGTGCTCC                                  | RT-CHOP_PCR      | This study   |
| AP_CHOP_PCR_6A_R       | 4837      | TCTCCCTCCCATGTGAGTGATCCTGC                                  | RT-CHOP_PCR      | This study   |
| AP_CHOP_PCR_2B_F       | 4824      | CTGCAGAAAGGCACCAACCTCAGAG                                   | RT-CHOP_PCR      | This study   |
| AP_CHOP_PCR_2B_R       | 4825      | AGGACAACCTTTGTTCTCCATTATGATC                                | RT-CHOP_PCR      | This study   |
| AP_CHOP_PCR_5A_F       | 4834      | GTCGACATGGAAGGAGCTTGAGATACCC                                | RT-CHOP_PCR      | This study   |
| AP_CHOP_PCR_5A_R       | 4835      | CGACTCTTGTGTTCCCTTACACATCATAGC                              | RT-CHOP_PCR      | This study   |
| AP_CHOP_PCR_8A_F       | 4842      | CAATGGTGAGAAGATGCATTTGATGATGC                               | RT-CHOP_PCR      | This study   |
| AP_CHOP_PCR_8A_R       | 4843      | CCACGGCATCCATTCTCTCAGATGG                                   | RT-CHOP_PCR      | This study   |
| 5A_F_VHS_OsChOP        | 3997      | AAATGTACTTACCCTCACGAGCAT                                    | RT-CHOP_PCR      | <sup>6</sup> |
| 5A_R_VHS_OsChOP        | 3998      | AATTTTACTACACTTGCGAGCCAA                                    | RT-CHOP_PCR      | <sup>6</sup> |
| SGH_OsActin_RT_F       | 2929      | ATGAAGTGCAGCGTGGATATTAG                                     | RT-qPCR          | This study   |
| SGH_OsActin_RT_R       | 2930      | GGGCGACCACCTTGATCTTC                                        | RT-qPCR          | This study   |
| AP_BS_Os01g022930_0_F1 | 4991      | ATTTTTTGTGTTTTGGAGTTGTATT                                   | Bisulfite-PCR    | This study   |
| AP_BS_Os01g022930_0_R1 | 4992      | AACCATACTTTATATATATTACCCACACTT                              | Bisulfite-PCR    | This study   |
| AP_BS_Os05g032710_0_F1 | 4997      | TAATTTTTGTTTTAGTTTATGAATT                                   | Bisulfite-PCR    | This study   |
| AP_BS_Os05g032710_0_R1 | 4998      | CCTATAATACATCCTCAAATATCTTAC                                 | Bisulfite-PCR    | This study   |
| AP_BS_Os05g032710_0_F2 | 4999      | GAGGTAGGTTATTAATATGTTTTTTTT                                 | Bisulfite-PCR    | This study   |
| AP_BS_Os05g032710_0_R2 | 5000      | AATATCTCAAACCTCCTTCCATATC                                   | Bisulfite-PCR    | This study   |
| AP_siren2_BS_F2        | 5025      | TTTAGTTGATTTAATGGTTAATATG                                   | Bisulfite-PCR    | This study   |
| AP_siren2_BS_R2        | 5026      | AAAAAACACTTTTCATCTAAAATATC                                  | Bisulfite-PCR    | This study   |
| AP_siren2_BS_F4        | 5029      | GGAGATATTTATTTGTTATGGGGAT                                   | Bisulfite-PCR    | This study   |
| AP_siren2_BS_R4        | 5030      | AAAATCAAAAATTACCCTATTTACTCTACT                              | Bisulfite-PCR    | This study   |
| AP_ARF22_CRS_F1        | 5071      | GCACCAGCCCATGACAATATCTCTTGT TTTG                            | Imprinting study | This study   |
| AP_ARF22_CRS_R1        | 5073      | TGCTCAGTAAATATAGCCTTTCCAAACAGC                              | Imprinting study | This study   |
| AP_SHH1_CRS_F2         | 5076      | GACCTTGTCCTCTGTTTCAAGGAGAGC                                 | Imprinting study | This study   |
| AP_SHH1_CRS_R2         | 5078      | CCATCATGGTCGTATTCGACAAGGAA GACAC                            | Imprinting study | This study   |
| AP_CLSY3_CRS_F1        | 5079      | GAGAAATGTAAGATTGCTCAGAGGAGGAAGC                             | Imprinting study | This study   |
| AP_CLSY3_CRS_R1        | 5081      | CAGGAACAGGCTCATATTGGTTGCTCTC                                | Imprinting study | This study   |
| AP_WP/PB1_F            | 3934      | TCCACAATGCGTCAGAAACAATG                                     | Imprinting study | This study   |
| AP_WP/PB1_R            | 3937      | CAGTTCATCTTCATCCTGTAACCTGTGTC                               | Imprinting study | This study   |
| miRNA168               | 32        | GTCGCCGAGAAGATCCTCCATC                                      | sRNA northern    | This study   |
| U6_probes              | 13 and 14 | GGCCATGCTAATCTTCTGTATCGTT AND CCAATTTTATCGGATGTCCCCGAAGGGAC | sRNA northern    | This study   |
| amiR_PolIV probe       | 1697      | ATGTCCAAGAGTAACACTATA                                       | sRNA northern    | <sup>1</sup> |
| MITE siRNA             | 3430      | GGTCCCACCTGTCATACACACT                                      | sRNA northern    | This study   |
| AP_CLSY3_amiR1_probe   | 3877      | GCGAGGCCTTATTGTATCGAA                                       | sRNA northern    | This study   |
| AP_CLSY3_amiR2_probe   | 3878      | AGGGCGGACTTCAATTGAACA                                       | sRNA northern    | This study   |



|                      |      |                          |               |            |
|----------------------|------|--------------------------|---------------|------------|
| AP_CLSY4_amiR1_probe | 3880 | GAGAGGTCATTCGTGCTTACA    | sRNA northern | This study |
| AP_siren_probe2      | 4751 | CCCGTGTGCAGGTTCTAGTTCCGG | sRNA northern | This study |
| AP_siren_probe3      | 4752 | CCGTGTGCAGGTTCTAGTTCCGG  | sRNA northern | This study |

## Supplementary References:

1. Hari Sundar G, V. *et al.* Plant polymerase IV sensitizes chromatin through histone modifications to preclude spread of silencing into protein-coding domains. *Genome Res.* (2023) doi:10.1101/gr.277353.122.
2. Hu, D. *et al.* Multiplex CRISPR-Cas9 editing of DNA methyltransferases in rice uncovers a class of non-CG methylation specific for GC-rich regions. *Plant Cell* **33**, 2950–2964 (2021).
3. Wang, L. *et al.* Reinforcement of CHH methylation through RNA-directed DNA methylation ensures sexual reproduction in rice. *Plant Physiol.* **188**, 1189–1209 (2022).
4. Xu, L. *et al.* Regulation of rice tillering by RNA-directed DNA methylation at miniature inverted-repeat transposable elements. *Mol. Plant* **13**, 851–863 (2020).
5. Zheng, K. *et al.* The effect of RNA polymerase V on 24-nt siRNA accumulation depends on DNA methylation contexts and histone modifications in rice. *Proc. Natl. Acad. Sci. U. S. A.* **118**, e2100709118 (2021).
6. Chakraborty, T., Trujillo, J. T., Kendall, T. & Mosher, R. A. A null allele of the pol IV second subunit impacts stature and reproductive development in *Oryza sativa*. *Plant J.* **111**, 748–755 (2022).
7. Rodrigues, J. A. *et al.* Divergence among rice cultivars reveals roles for transposition and epimutation in ongoing evolution of genomic imprinting. *Proc. Natl. Acad. Sci. U. S. A.* **118**, e2104445118 (2021).
8. Wu, L. *et al.* Rice MicroRNA effector complexes and targets. *Plant Cell* **21**, 3421–3435 (2009).
9. Chen, C. *et al.* Characterization of imprinted genes in rice reveals conservation of regulation and imprinting with other plant species. *Plant Physiology* **177**, 1754–1771 (2018).
